# Supplementary material for: Challenging Structure Elucidation of Lumnitzeralactone, an Ellagic Acid Derivative from the Mangrove Lumnitzera racemosa
Source: MDPI journal article supplement (doi:10.3390/md21040242), 2023-04-14
Supplement: s1 [file s1]

## Supporting Information

### Challenging structure elucidation of lumnitzeralactone, an ellagic acid derivative from the mangrove *Lumnitzera racemosa*

Jonas Kappen<sup>1</sup>, Jeprianto Manurung<sup>1,2,3</sup>, Tristan Fuchs<sup>1</sup>, S. Phani B. Vemulapalli<sup>4,5</sup>, Lea M. Schmitz<sup>1</sup>, Andrej Frolov<sup>1</sup>, Andria Augusta<sup>6</sup>, Alexandra N. Muellner-Riehl<sup>2,3</sup>, Christian Griesinger<sup>4\*</sup>, Katrin Franke<sup>1,3,7\*</sup> and Ludger A. Wessjohann<sup>1,3\*</sup>

<sup>1</sup> Department of Bioorganic Chemistry, Leibniz Institute of Plant Biochemistry (IPB), 06120 Halle (Saale), Germany; jkappen@ipb-halle.de (J.K.); tfuchs@ipb-halle.de (T.F.); lschmitz@ipb-halle.de (L.M.S.); andrej.frolov@ipb-halle.de (A.F.); wessjohann@ipb-halle.de (L.A.W.); kfranke@ipb-halle.de (K.F.)

<sup>2</sup> Department of Molecular Evolution and Plant Systematics & Herbarium (LZ), Institute of Biology, Leipzig University, 04103 Leipzig, Germany; jeprianto\_m@apps.ipb.ac.id (J.M.); muellner-riehl@uni-leipzig.de (A.N.M.R.)

<sup>3</sup> German Centre for Integrative Biodiversity Research (iDiv) Halle-Jena-Leipzig, 04103 Leipzig, Germany

<sup>4</sup> Department of NMR-Based Structural Biology, Max Planck Institute for Multidisciplinary Sciences, Am Fassberg 11, 37077 Göttingen, Germany; save@mpinat.mpg.de (S.P.B.V.); cigr@mpinat.mpg.de (C.G.)

<sup>5</sup> Research Group for Marine Geochemistry, Institute for Chemistry and Biology of the Marine Environment (ICBM), Carl von Ossietzky Universität Oldenburg, Carl-von-Ossietzky-Str. 9-11, 26129 Oldenburg, Germany

<sup>6</sup> Research Center for Pharmaceutical Ingredients and Traditional Medicine, National Research and Innovation Agency (BRIN), Jl. M.H. Thamrin No. 8, Jakarta 10340, Indonesia; andr005@brin.go.id (A.A.)

<sup>7</sup> Institute of Biology/Geobotany and Botanical Garden, Martin Luther University Halle-Wittenberg, Halle, Germany

\* Correspondence: cigr@mpinat.mpg.de, Tel: +49 551 201-2201 (C.G.); kfranke@ipb-halle.de, Tel: +49-345-5582-1380 (K.F.); wessjohann@ipb-halle.de, Tel: +49-345-5582-1301 (L.A.W.)

| <b>Content</b>                                                                                                                | <b>page</b> |
|-------------------------------------------------------------------------------------------------------------------------------|-------------|
| Figure S1: TLC after the Bornträger-reaction                                                                                  | 3           |
| Scheme S1: Putative mechanism of the Bornträger reaction                                                                      | 3           |
| Figure S2-1–S2-13: 1D and 2D NMR spectra of compound <b>1</b>                                                                 | 4           |
| Table S1-1–S1-3: <sup>1</sup> H, <sup>13</sup> C and HMBC data of compound <b>1</b> in different solvents and field strengths | 11          |
| Figure S3-1–S3-4: 1D and 2D NMR spectra of compound <b>5</b>                                                                  | 12          |
| Figure S4-1–S4-5: 1D and 2D NMR spectra of compound <b>1b</b>                                                                 | 14          |
| Figure S5-1–S5-2: MS data of compound <b>1</b>                                                                                | 16          |
| Figure S6-1–S6-2: MS data of compound <b>1b</b>                                                                               | 17          |
| Figure S7-1–S7-2: MS data of compound <b>5</b>                                                                                | 18          |
| Table S2-1–S2-2: Additional data DFT-Calculations                                                                             | 20          |
| Figure S8-1–S8-3: Structure elucidation report - ACD-SE-Calculation                                                           | 24          |
| Scheme S2-1: Suggested pathway for the biosynthesis of compound <b>1</b>                                                      | 27          |
| Figure S9-1–S9-2: UV spectra of compound <b>1</b> , <b>1b</b> and <b>5</b>                                                    | 28          |
| Figure S10-1–S10-2: <sup>1</sup> H NMR spectrum and HPLC chromatogram of the fraction containing <b>1</b> and <b>3</b>        | 29          |

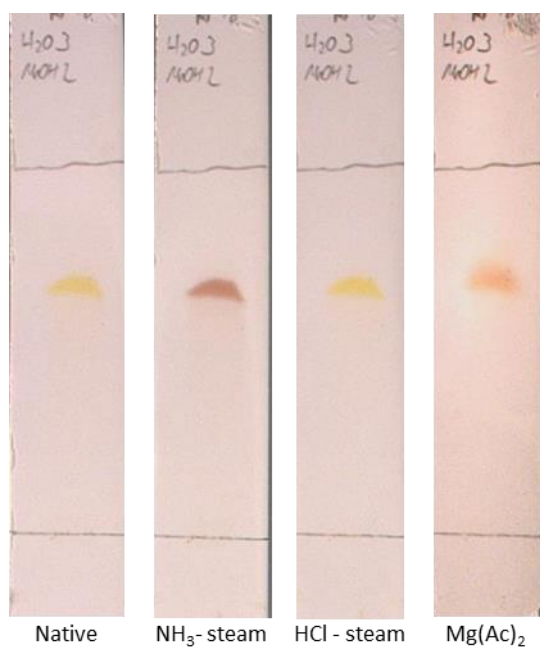

**Figure S1.** TLC of lumnitzeralactone (**1**) after the Bornträger reaction; stationary phase: RP18, solvent system: H<sub>2</sub>O:MeOH, 3:2 v/v.

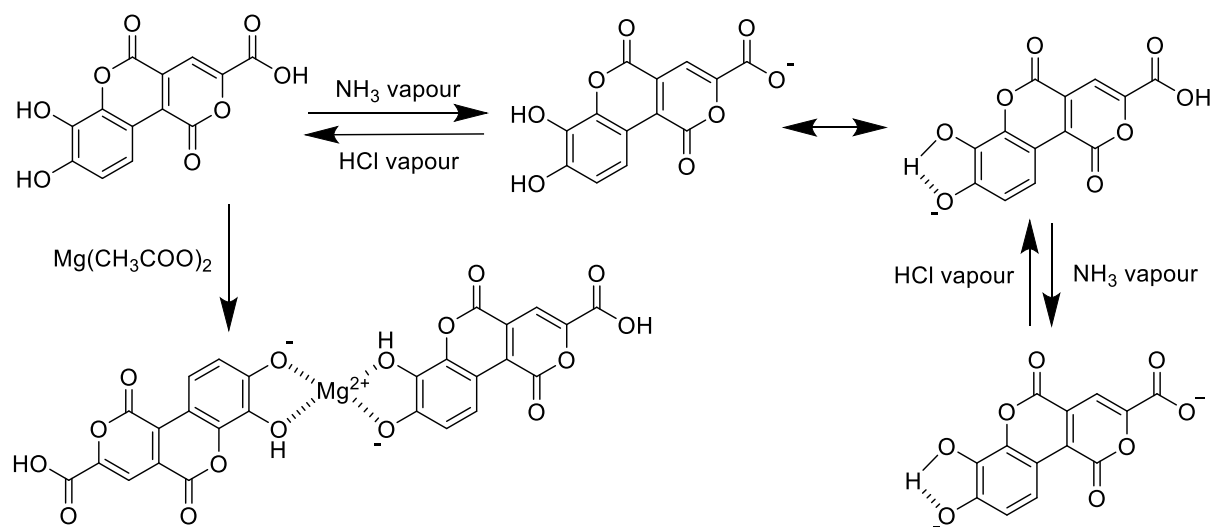

**Scheme S1.** Putative mechanism of the Bornträger reaction for lumnitzeralactone (**1**)

Lumnitzeralactone (**1**)

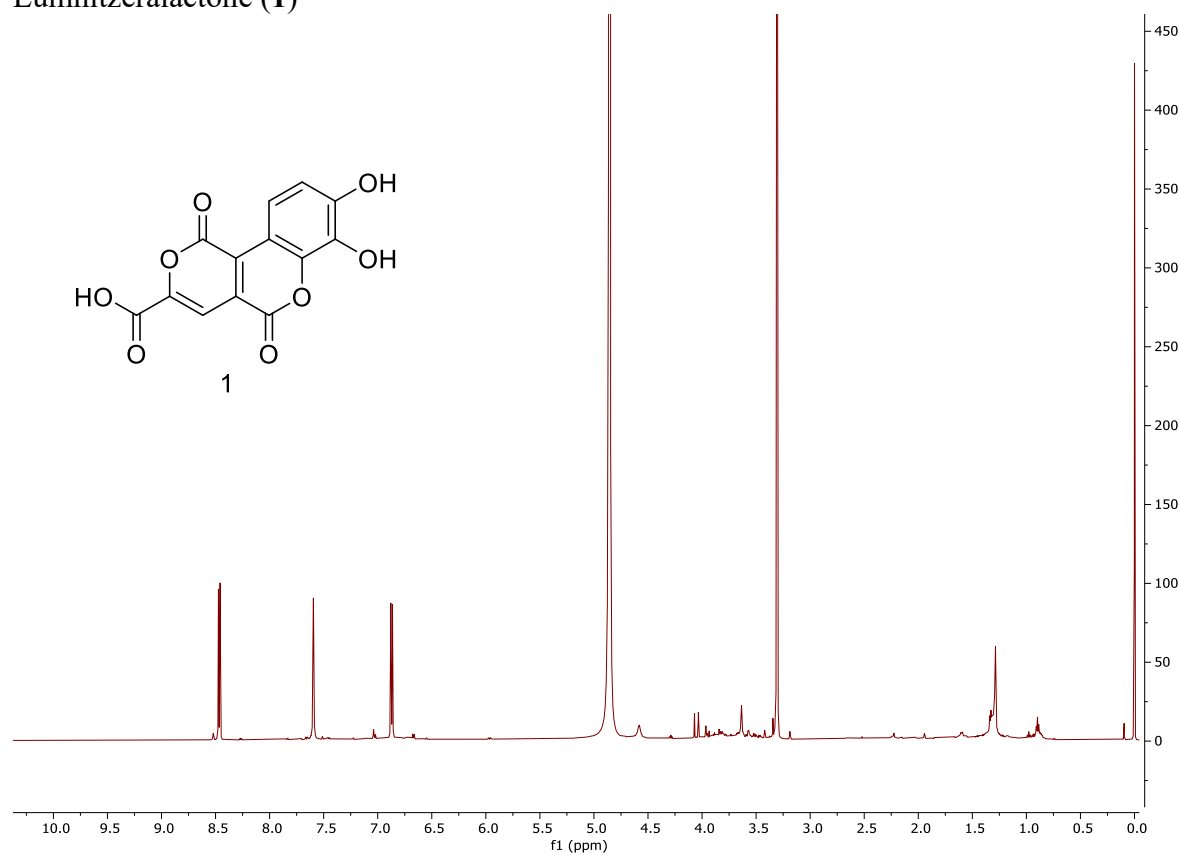

**Figure S2-1.** <sup>1</sup>H NMR spectrum of compound **1** in MeOH-*d*<sub>4</sub>, 600 MHz

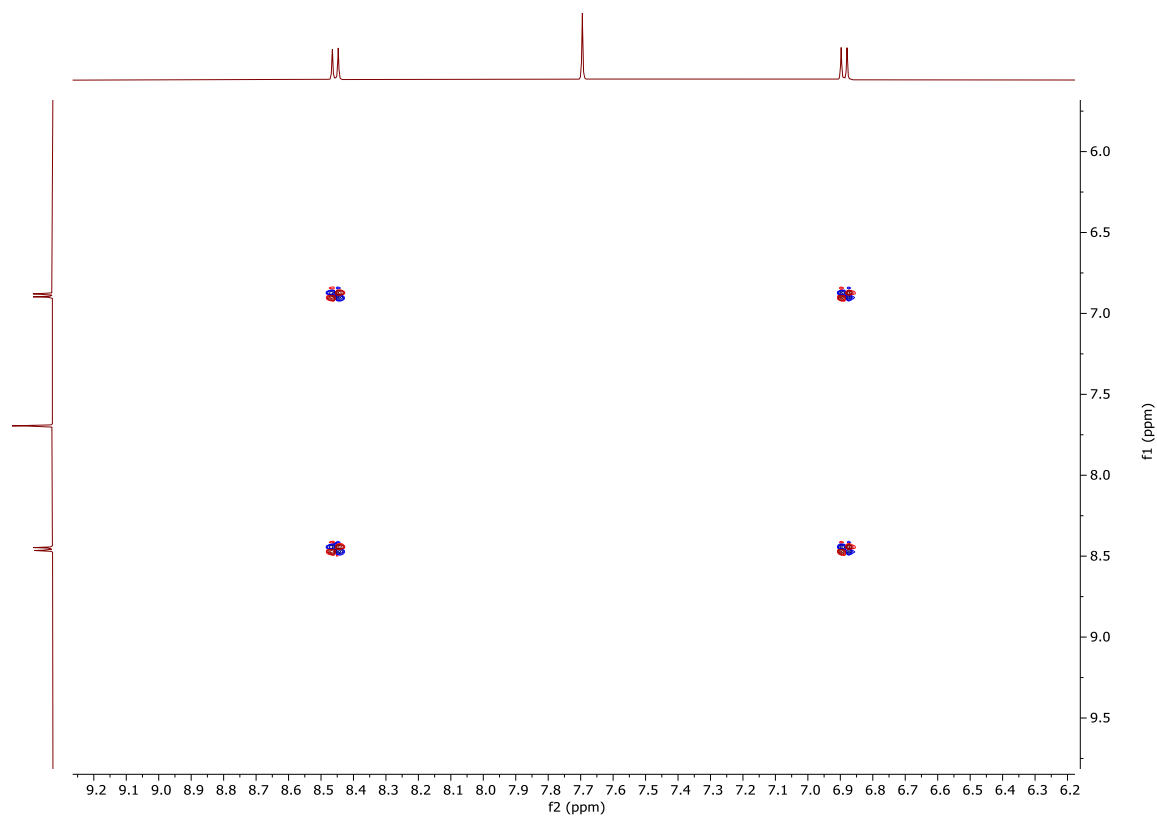

**Figure S2-2.** COSY spectrum of compound **1** in MeOH-*d*<sub>4</sub>, 500 MHz

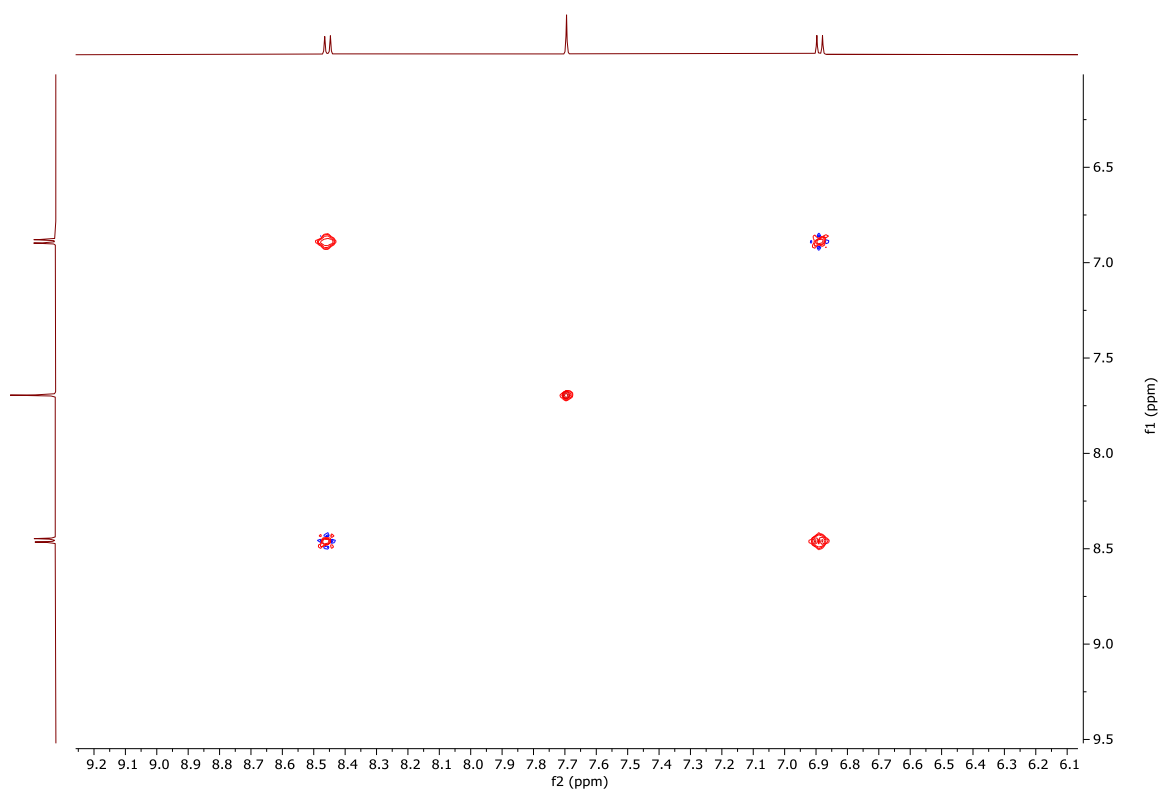

**Figure S2-3.** TOCSY spectrum of compound **1** in MeOH-*d*<sub>4</sub>, 500 MHz

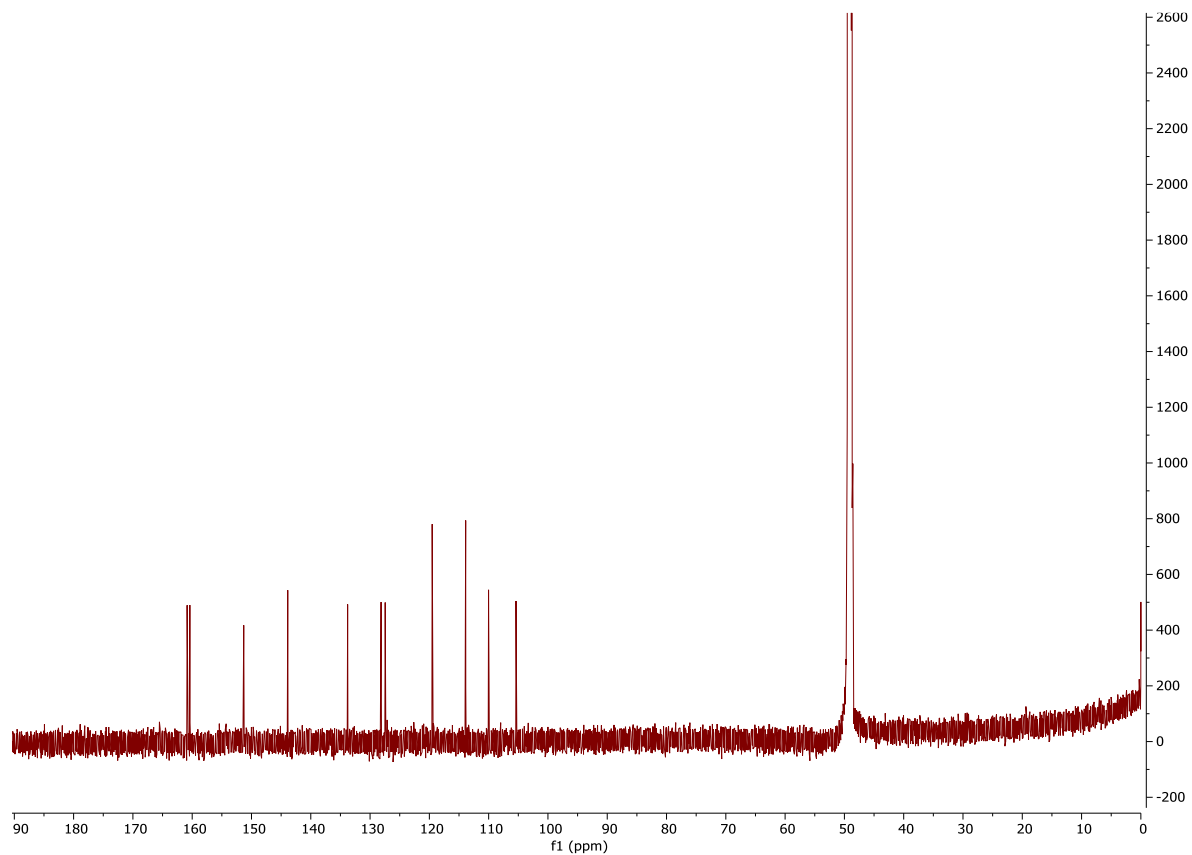

**Figure S2-4.** <sup>13</sup>C-NMR spectrum of compound **1** in MeOH-*d*<sub>4</sub>, 150 MHz

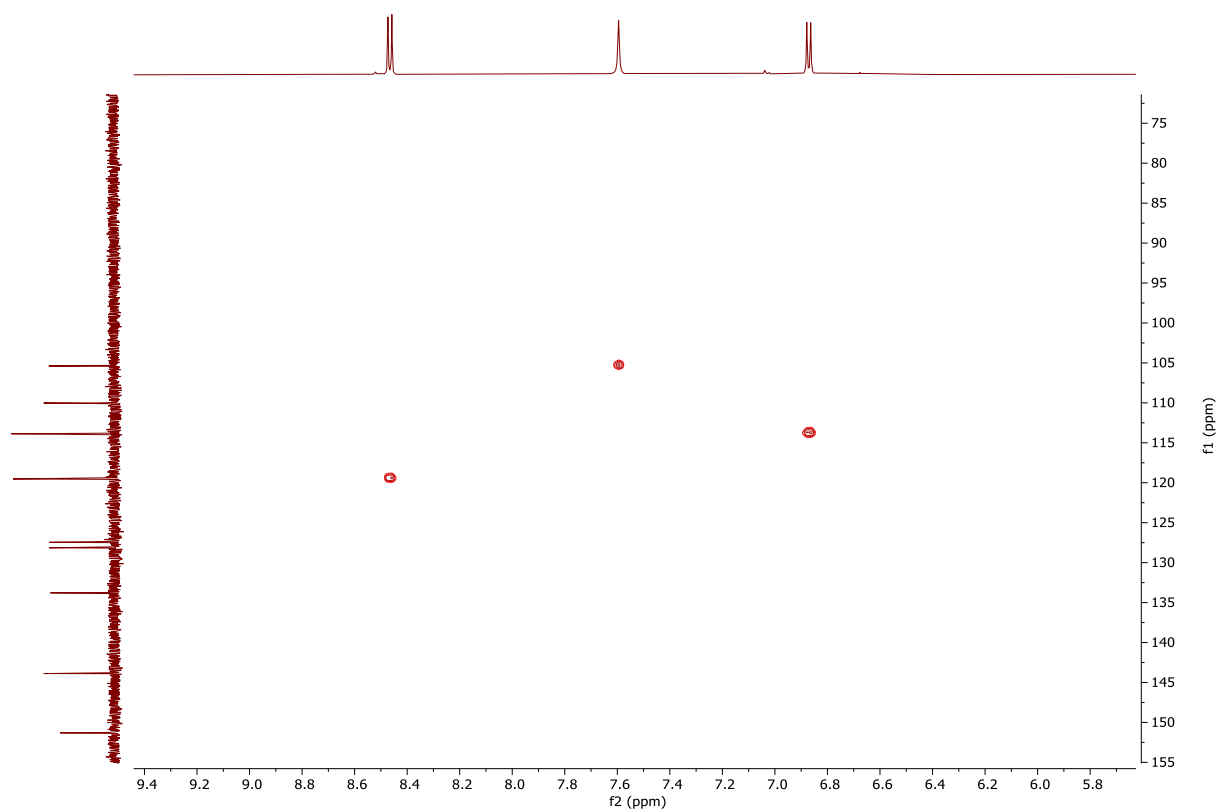

**Figure S2-5.** HSQC spectrum of compound **1** in MeOH-*d*<sub>4</sub>, 600/150 MHz

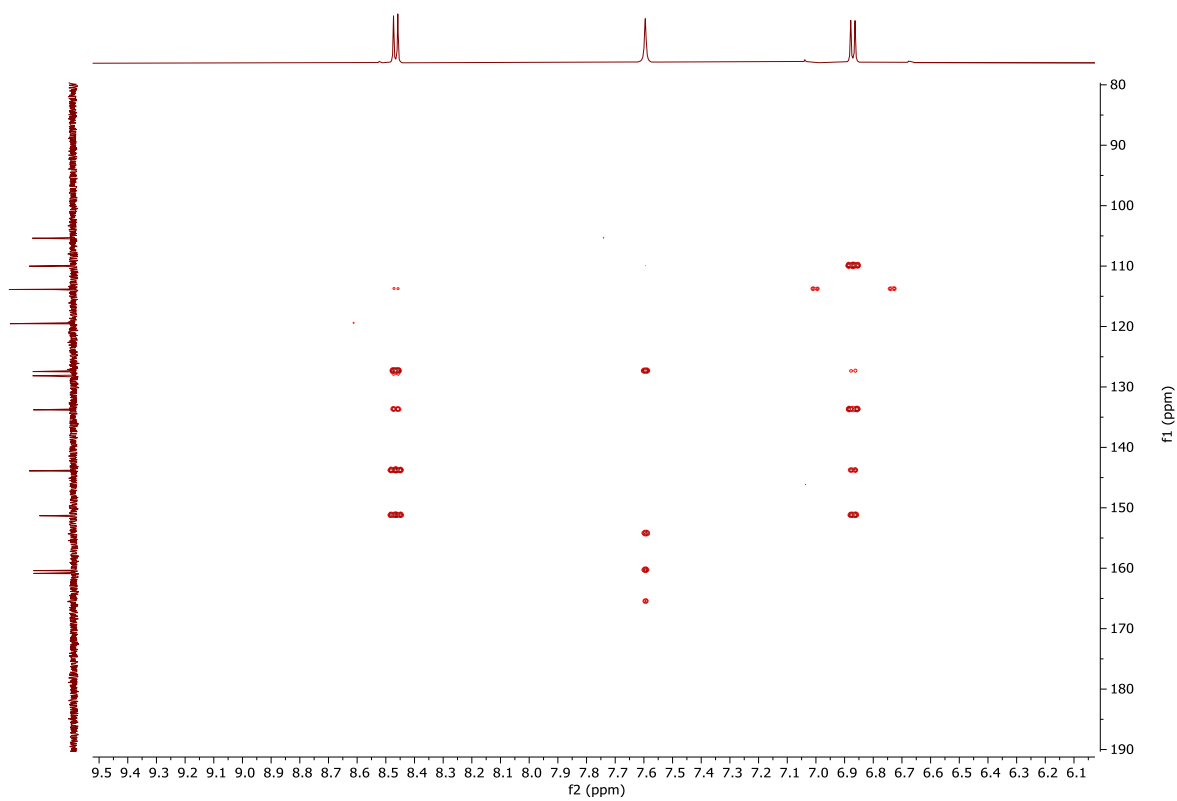

**Figure S2-6.** HMBC spectrum of compound **1** in MeOH-*d*<sub>4</sub>, 600/150 MHz

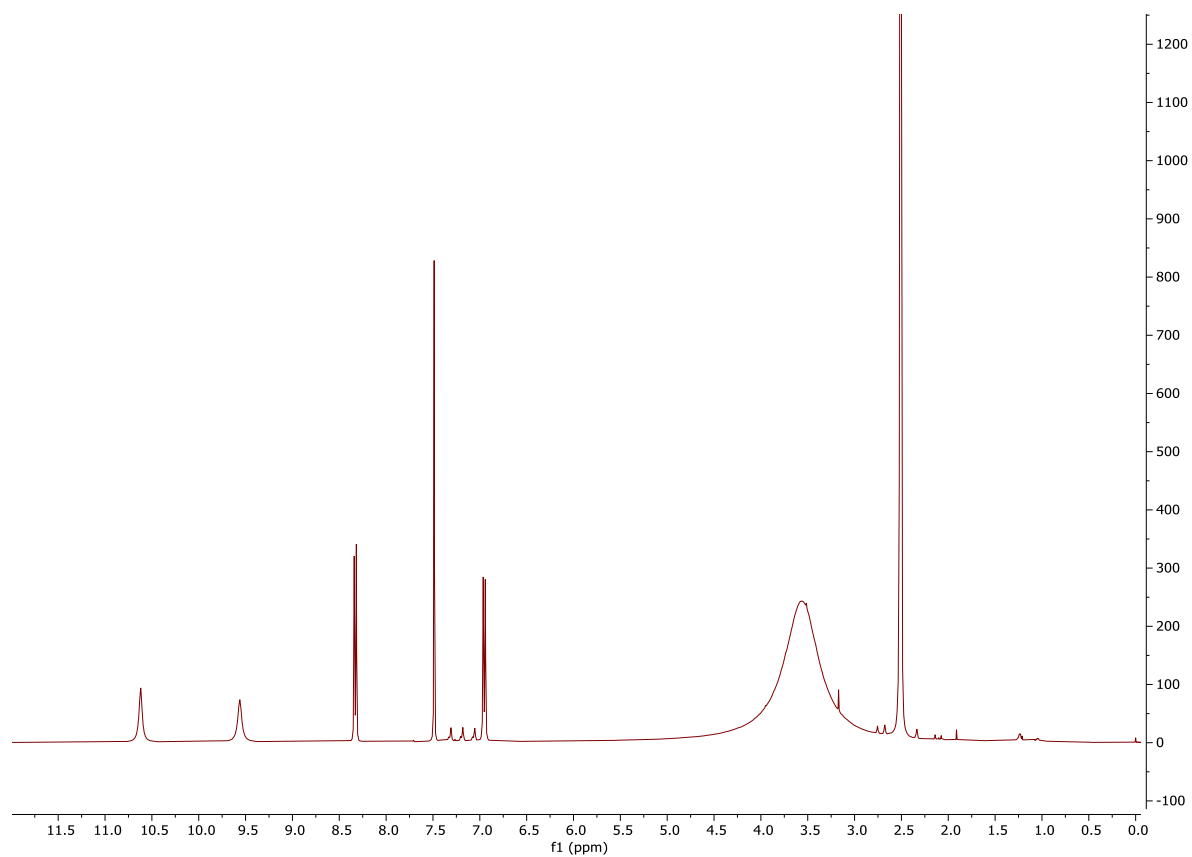

**Figure S2-7.**  $^1\text{H}$  NMR spectrum of compound **1** in  $\text{DMSO-}d_6$ , 400 MHz

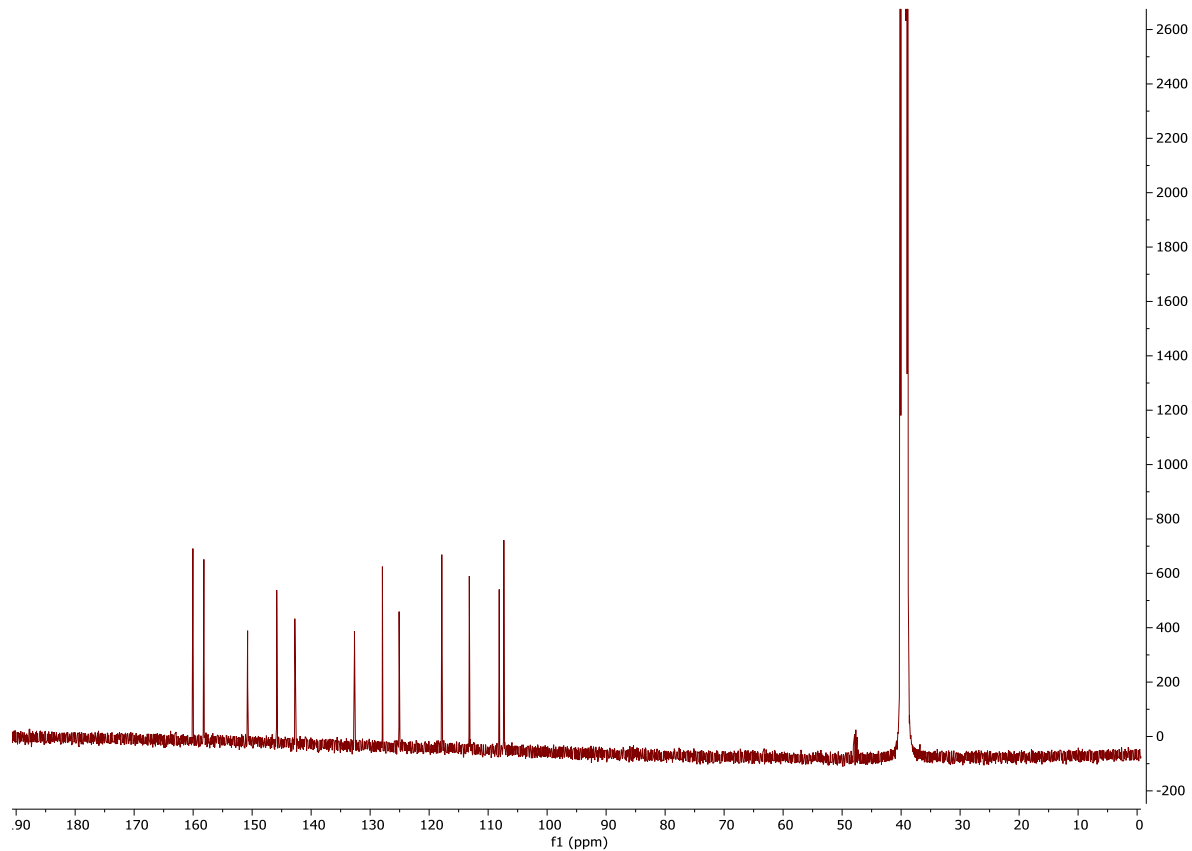

**Figure S2-8.**  $^{13}\text{C}$  NMR spectrum of compound **1** in  $\text{DMSO-}d_6$ , 100 MHz

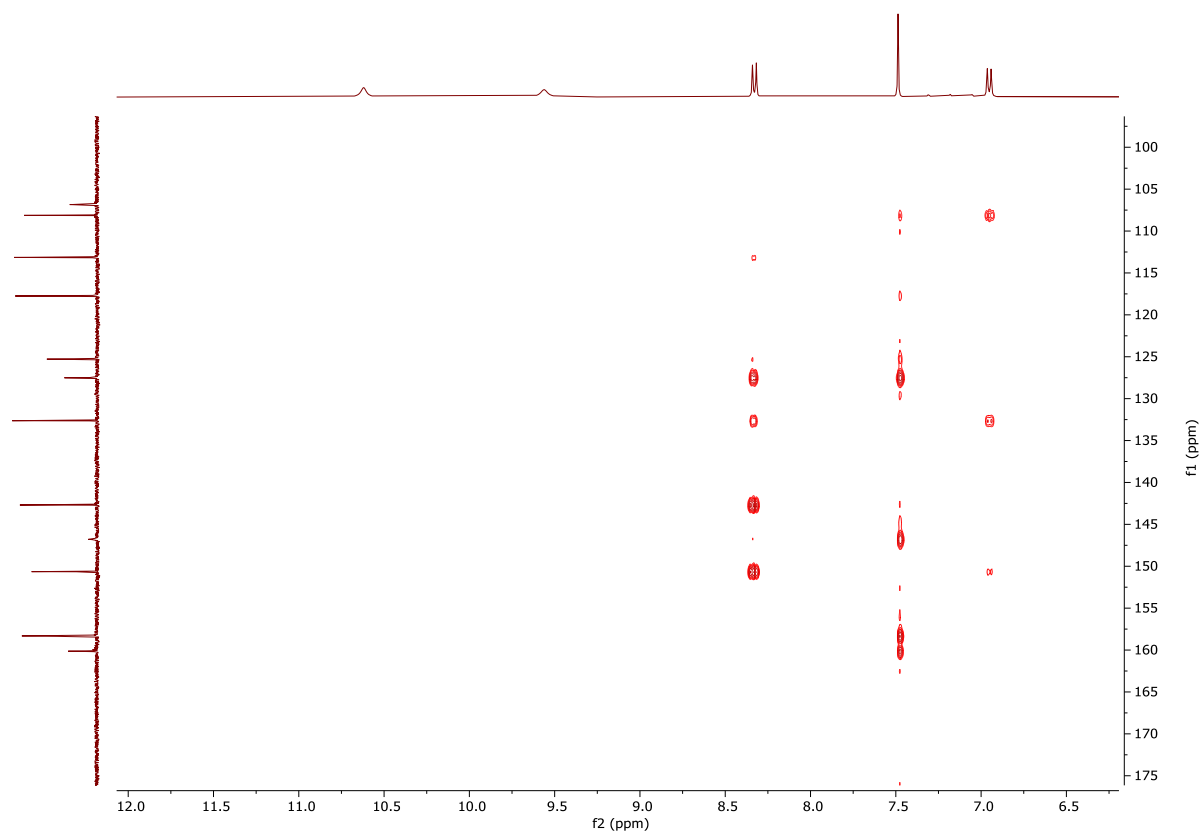

**Figure S2-9.** HMBC spectrum of compound **1** in DMSO-*d*<sub>6</sub>, 600/150 MHz

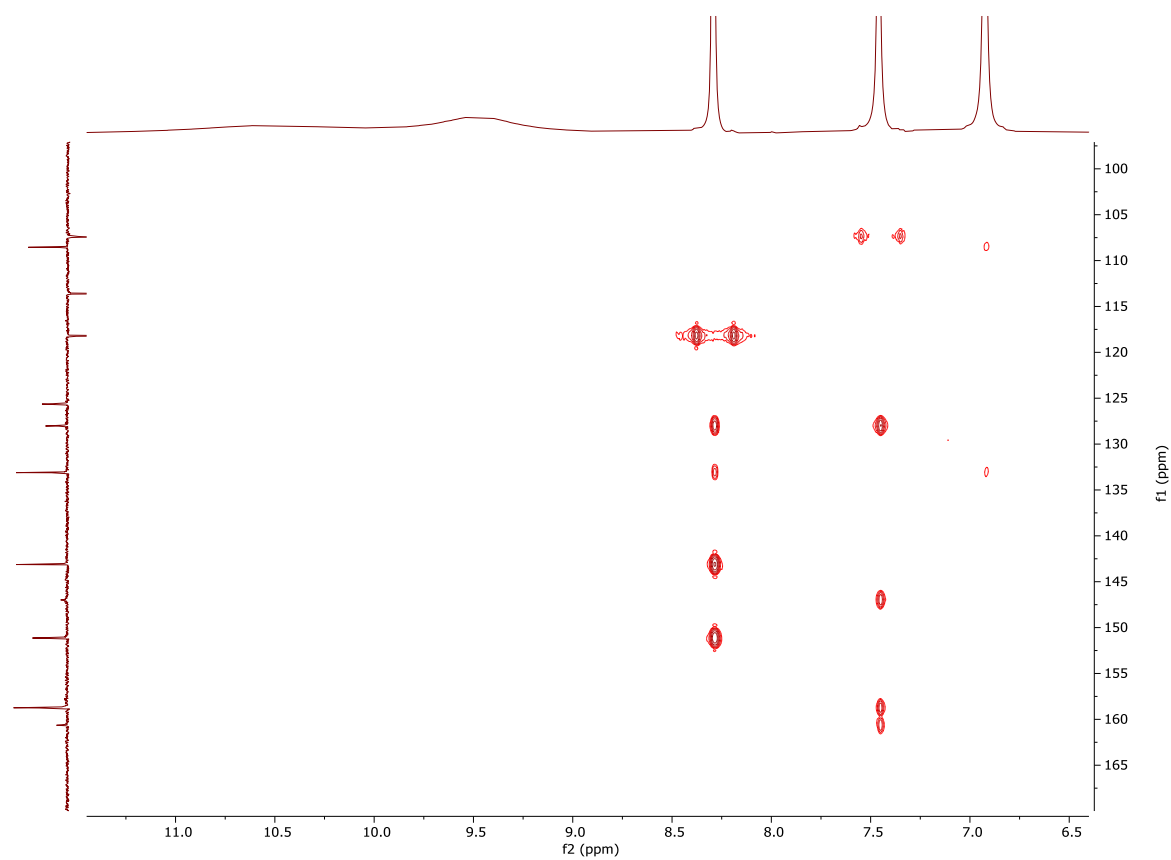

**Figure S2-10.** HMBC spectrum of compound **1** in DMSO-*d*<sub>6</sub>, 900/226 MHz



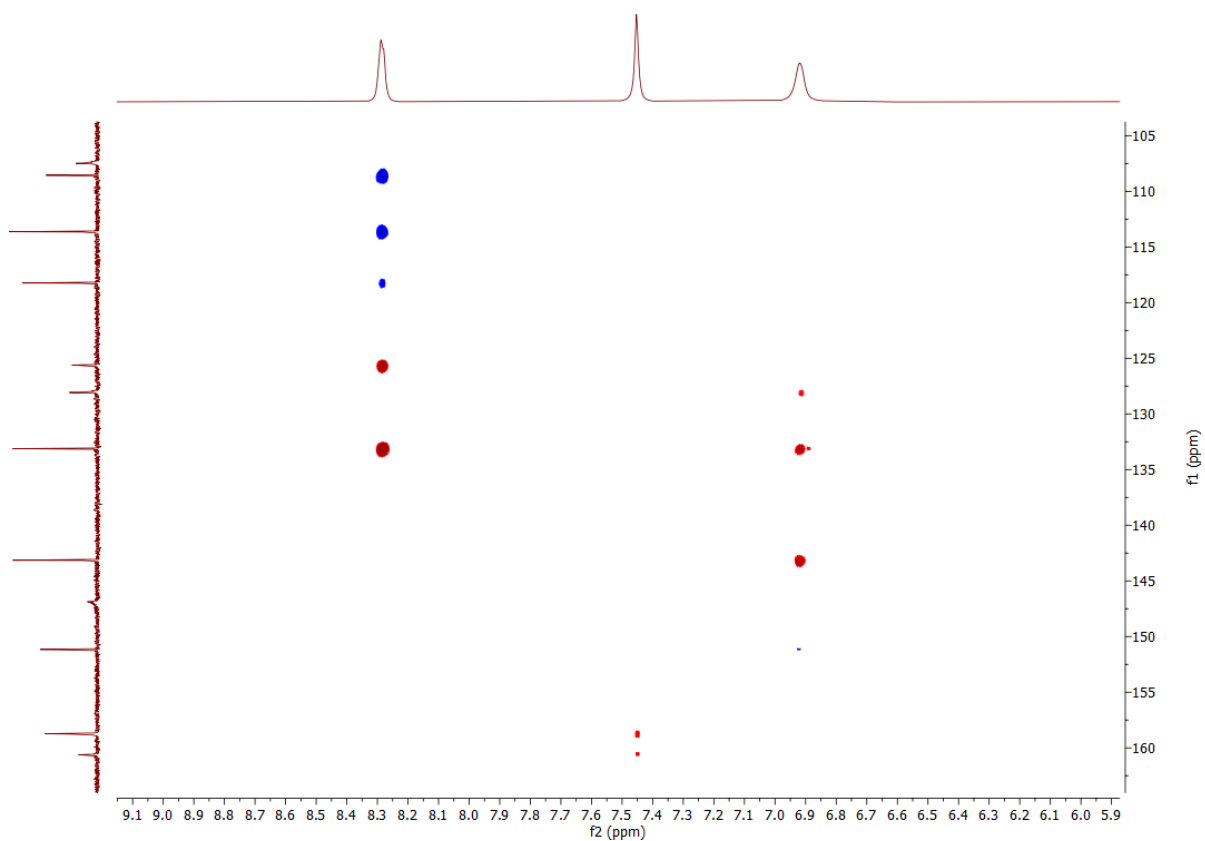

**Figure S2-11.** 1,n-ADEQUATE spectrum of compound **1** in DMSO-*d*<sub>6</sub>, 800/200 MHz

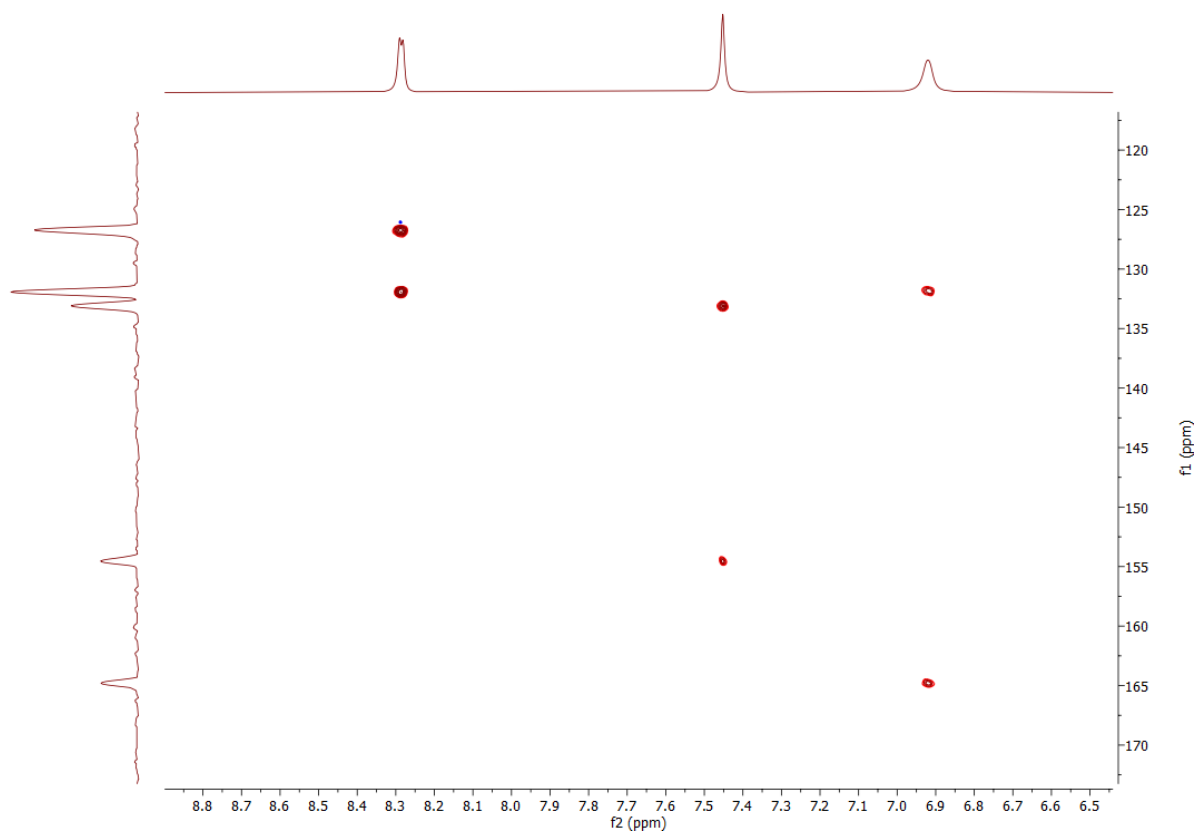

**Figure S2-12.** 1,1-ADEQUATE spectrum of compound **1** in DMSO-*d*<sub>6</sub>, 900/226 MHz

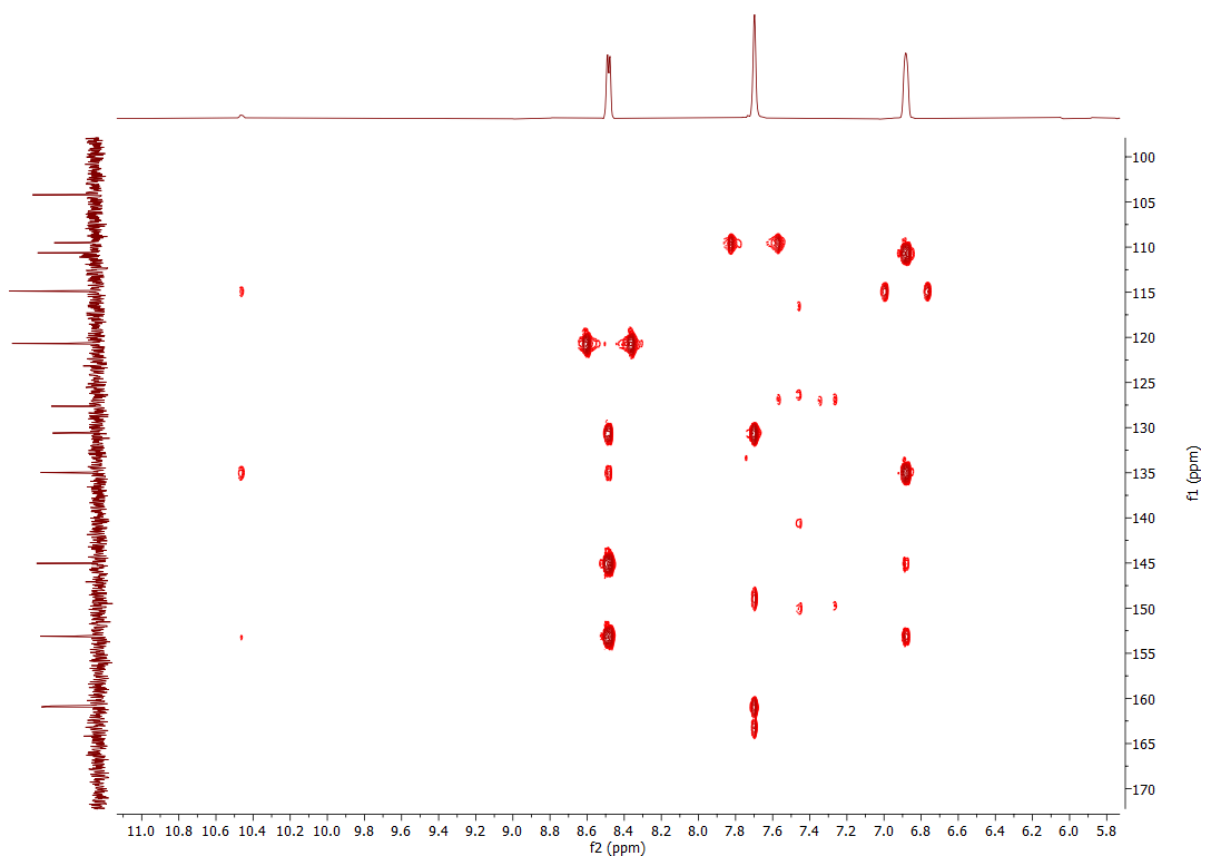

**Figure S2-13.** HMBC spectrum of compound **1** in MeOH-*d*<sub>3</sub>, 700/176 MHz, 253 K

**Table S1-1.** <sup>1</sup>H NMR data of compound **1** acquired in different solvents and under varying field strengths

| No. | type | $\delta_{\text{H}}^{\text{a}}$<br>MeOH- <i>d</i> 4<br>600 MHz | $\delta_{\text{H}}$<br>MeOH- <i>d</i> 4<br>400 MHz | $\delta_{\text{H}}$<br>DMSO- <i>d</i> 6<br>400 MHz | $\delta_{\text{H}}$<br>DMSO- <i>d</i> 6<br>800 MHz <sup>c</sup> | $\delta_{\text{H}}$<br>DMSO- <i>d</i> 6<br>900 MHz <sup>c</sup> | $\delta_{\text{H}}$<br>DMSO- <i>d</i> 6<br>600 MHz <sup>c</sup> | $\delta_{\text{H}}^{\text{b}}$<br>MeOH- <i>d</i> 3<br>800 MHz <sup>c</sup> | $\delta_{\text{H}}^{\text{b}}$<br>MeOH- <i>d</i> 3<br>700 MHz <sup>c</sup> |
|-----|------|---------------------------------------------------------------|----------------------------------------------------|----------------------------------------------------|-----------------------------------------------------------------|-----------------------------------------------------------------|-----------------------------------------------------------------|----------------------------------------------------------------------------|----------------------------------------------------------------------------|
| 4   | CH   | 7.59, s                                                       | 7.69, s                                            | 7.49, s                                            | 7.45, s                                                         | 7.45, s                                                         | 7.52, s                                                         | 7.70, s                                                                    | 7.70, s                                                                    |
| 9   | CH   | 6.87, d (9.0)                                                 | 6.88, d (9.0)                                      | 6.95, d (9.0)                                      | 6.92, br d (6.8)                                                | 6.92, br d (7.8)                                                | 6.99, br d (8.3)                                                | 6.89, d (9.0)                                                              | 6.88, d (9.0)                                                              |
| 10  | CH   | 8.46, d (9.0)                                                 | 8.45, d (9.0)                                      | 8.33, d (9.0)                                      | 8.28, d (6.8)                                                   | 8.28, d (7.8)                                                   | 8.35, d (8.3)                                                   | 8.48, d (9.0)                                                              | 8.48, d (9.0)                                                              |
| 7   | COH  |                                                               |                                                    | 9.56, s                                            | 9.52, s                                                         | 9.53, s                                                         | 9.60, s                                                         | 9.74, s                                                                    | 9.90, s                                                                    |
| 8   | COH  |                                                               |                                                    | 10.62, s                                           | 10.60, s                                                        | 10.65, s                                                        | 10.70, s                                                        | 10.30, s                                                                   | 10.46, s                                                                   |

<sup>a</sup> compound obtained under non-acidic conditions<sup>b</sup> low temperature**Table S1-2.** <sup>13</sup>C NMR data of compound **1** acquired in different solvents and under varying field strengths

| No. | type | $\delta_{\text{C}}^{\text{a}}$<br>MeOH- <i>d</i> 4<br>151 MHz | $\delta_{\text{C}}$<br>MeOH- <i>d</i> 4<br>126 MHz | $\delta_{\text{C}}$<br>DMSO- <i>d</i> 6<br>101 MHz | $\delta_{\text{C}}$<br>DMSO- <i>d</i> 6<br>201 MHz <sup>c</sup> | $\delta_{\text{C}}$<br>DMSO- <i>d</i> 6<br>151 MHz <sup>c</sup> | $\delta_{\text{C}}$<br>DMSO- <i>d</i> 6<br>226 MHz <sup>c</sup> | $\delta_{\text{C}}^{\text{b}}$<br>MeOH- <i>d</i> 3<br>176 MHz |
|-----|------|---------------------------------------------------------------|----------------------------------------------------|----------------------------------------------------|-----------------------------------------------------------------|-----------------------------------------------------------------|-----------------------------------------------------------------|---------------------------------------------------------------|
| 1   | C=O  | 160.3                                                         | 159.7                                              | 158.2                                              | 158.7                                                           | 158.7                                                           | 158.7                                                           | 158.5                                                         |
| 3   | C    | 154.4 <sup>c</sup>                                            | 147.4                                              | 145.8                                              | 146.9                                                           | 146.9                                                           | 147.9                                                           | 144.7                                                         |
| 4   | CH   | 105.3                                                         | 108.9                                              | 107.3                                              | 107.4                                                           | 107.4                                                           | 107.4                                                           | 107.17                                                        |
| 4a  | C    | 128.1                                                         | 126.5                                              | 125.1                                              | 125.6                                                           | 125.6                                                           | 125.7                                                           | 125.2                                                         |
| 5   | C=O  | 160.8                                                         | 159.9                                              | 158.3                                              | 158.7                                                           | 158.7                                                           | 158.7                                                           | 158.6                                                         |
| 6a  | C    | 143.8                                                         | 144.3                                              | 142.8                                              | 143.1                                                           | 143.0                                                           | 143.1                                                           | 142.6                                                         |
| 7   | C    | 133.7                                                         | 133.9                                              | 132.7                                              | 133.1                                                           | 133.1                                                           | 133.0                                                           | 132.6                                                         |
| 8   | C    | 151.3                                                         | 152.2                                              | 150.8                                              | 151.2                                                           | 151.1                                                           | 151.1                                                           | 150.8                                                         |
| 9   | CH   | 113.8                                                         | 114.1                                              | 113.2                                              | 113.6                                                           | 113.6                                                           | 113.6                                                           | 112.6                                                         |
| 10  | CH   | 119.5                                                         | 120.0                                              | 117.9                                              | 118.2                                                           | 118.3                                                           | 118.2                                                           | 118.4                                                         |
| 10a | C    | 110.0                                                         | 109.7                                              | 108.1                                              | 108.5                                                           | 108.5                                                           | 108.5                                                           | 108.3                                                         |
| 10b | C    | 127.4                                                         | 129.9                                              | 127.9                                              | 128.0                                                           | 128.1                                                           | 128.1                                                           | 128.2                                                         |
| 11  | C=O  | 165.6 <sup>c</sup>                                            | 161.8                                              | 160.0                                              | 160.7                                                           | 160.5                                                           | 160.6                                                           | 161.8                                                         |

<sup>a</sup> compound obtained under non-acidic conditions<sup>b</sup> low temperature<sup>c</sup> derived from HMBC**Table S1-3.** HMBC data of compound **1** acquired in different solvents and under varying field strengths

| No.  | CD <sub>3</sub> OD- <i>d</i> 4 <sup>a</sup><br>(600, 151MHz) | DMSO- <i>d</i> 6<br>(600, 151 MHz) | CD <sub>3</sub> OD- <i>d</i> 4 <sup>a</sup><br>(500, 126MHz) | DMSO- <i>d</i> 6<br>(600, 151 MHz) | CD <sub>3</sub> OH- <i>d</i> 3 <sup>b</sup><br>(701, 176 MHz) | CD <sub>3</sub> OH- <i>d</i> 3 <sup>b</sup><br>(800, 201 MHz) | DMSO- <i>d</i> 6<br>(900, 226 MHz) |
|------|--------------------------------------------------------------|------------------------------------|--------------------------------------------------------------|------------------------------------|---------------------------------------------------------------|---------------------------------------------------------------|------------------------------------|
| 4    | 3, 5, 10a, 10b, 11                                           | 3, 4a, 5, 10a, 10b, 11             | 3, 5, 10b, 11                                                | 3, 5, 10b, 11                      | 3, 5, 10b, 11                                                 | 5, 10b, 11                                                    | 3, 5, 10b, 11                      |
| 9    |                                                              | 6a, 7, 8, 10a                      | 6a, 7, 8, 10a                                                | -                                  | 6a, 7, 8, 10a                                                 | 6a, 7, 8, 10, 10a, 10b                                        | 7, 10a                             |
| 10   |                                                              | 4a, 6a, 7, 8, 9, 10b               | 6a, 7, 8, 10b                                                | 6a, 7, 8, 10b                      | 6a, 7, 8, 10b                                                 | 1, 4a, 6a, 7, 8, 9, 10b                                       | 6a, 7, 8, 10b                      |
| 7-OH |                                                              |                                    |                                                              |                                    | -                                                             |                                                               |                                    |
| 8-OH |                                                              |                                    |                                                              |                                    | 7, 8, 9                                                       |                                                               |                                    |

blue = weak signal

<sup>a</sup> compound obtained under non-acidic conditions<sup>b</sup> low temperature

7,8-Dihydroxy-1,5-dioxo-1,5-dihydropyrano[4,3-c]chromene-3,10-dicarboxylic acid (**5**)

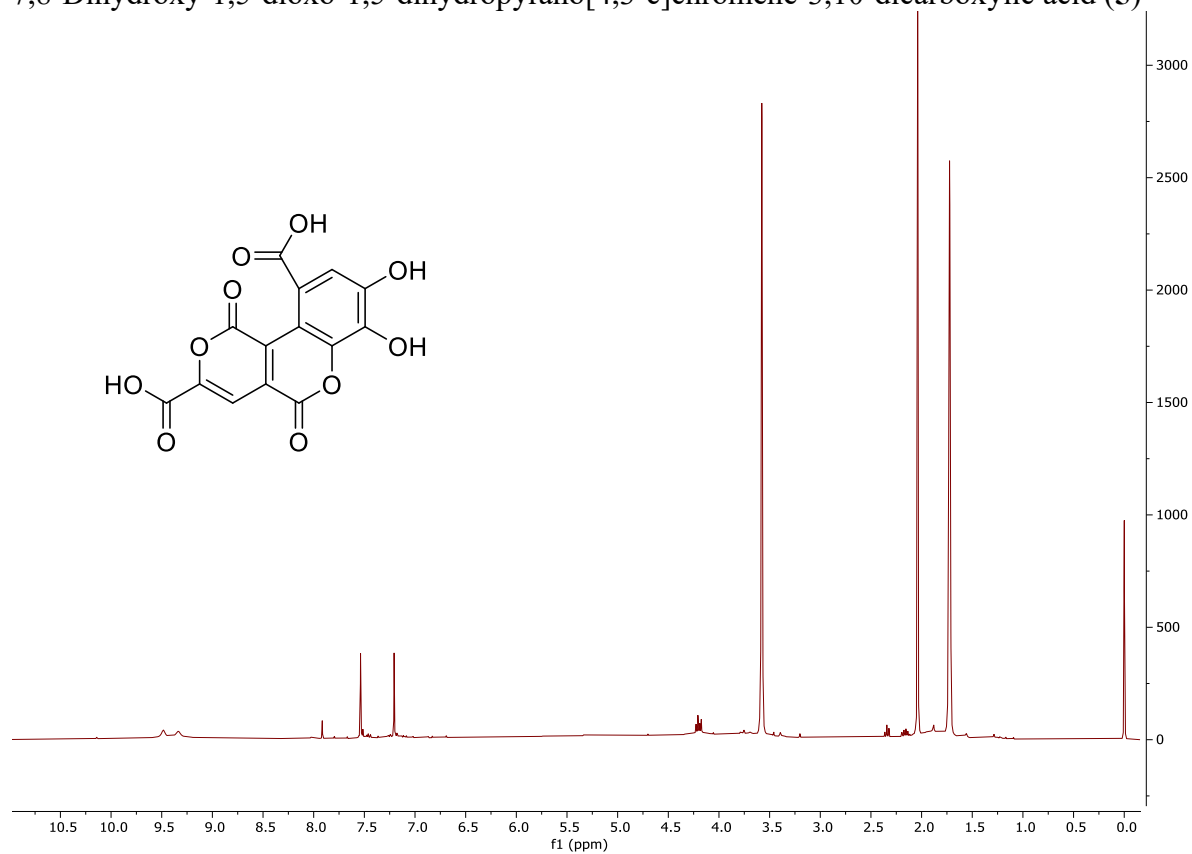

Figure S3-1. <sup>1</sup>H spectrum of compound **5** in THF-*d*<sub>8</sub>, 400 MHz

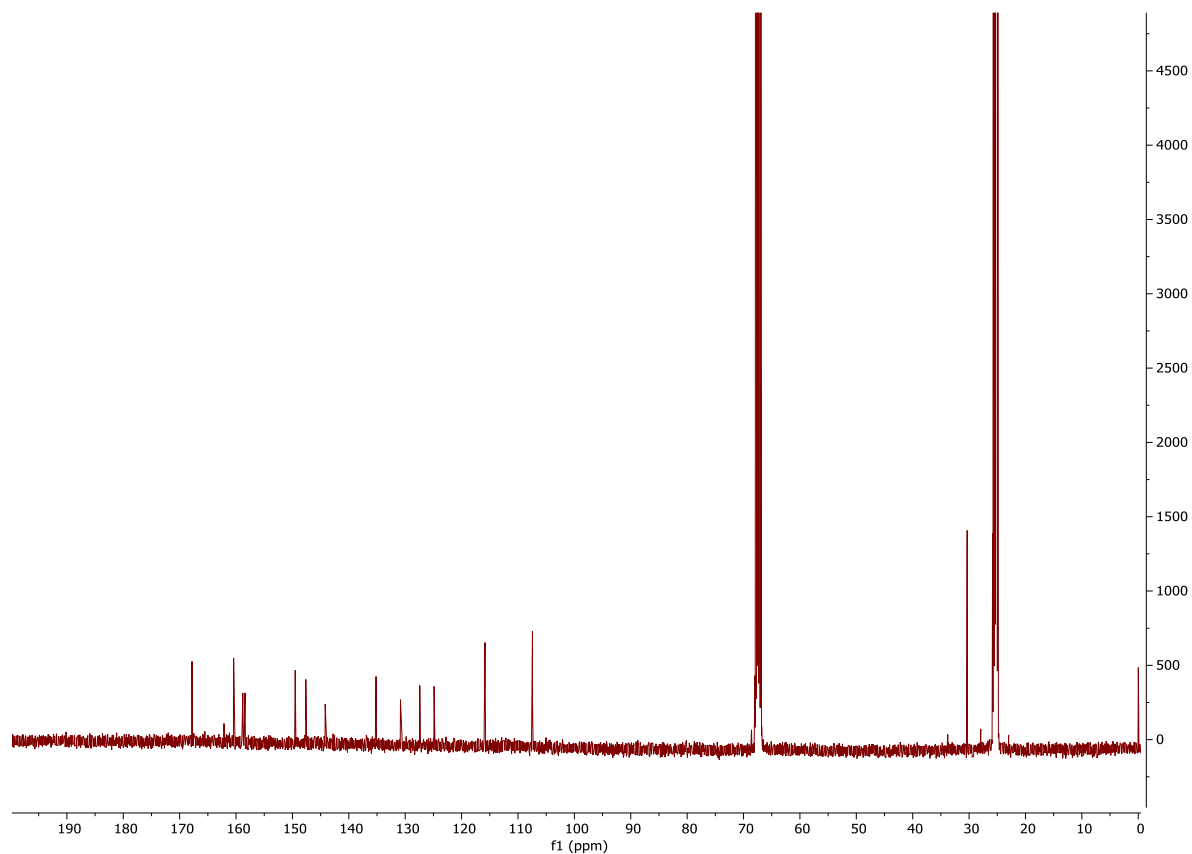

Figure S3-2. <sup>13</sup>C spectrum of compound **5** in THF-*d*<sub>8</sub>, 100 MHz

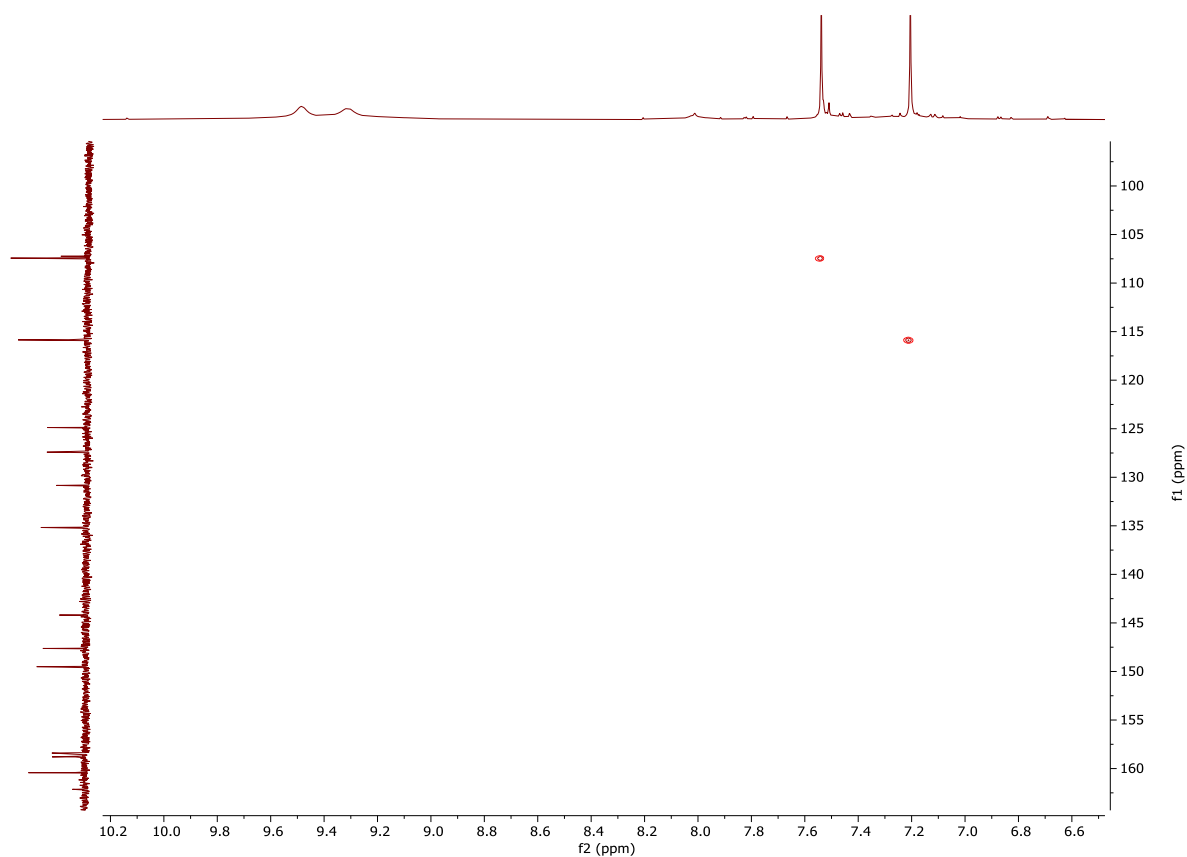

**Figure S3-3.** HSQC spectrum of compound **5** in THF-*d*8, 400/100 MHz

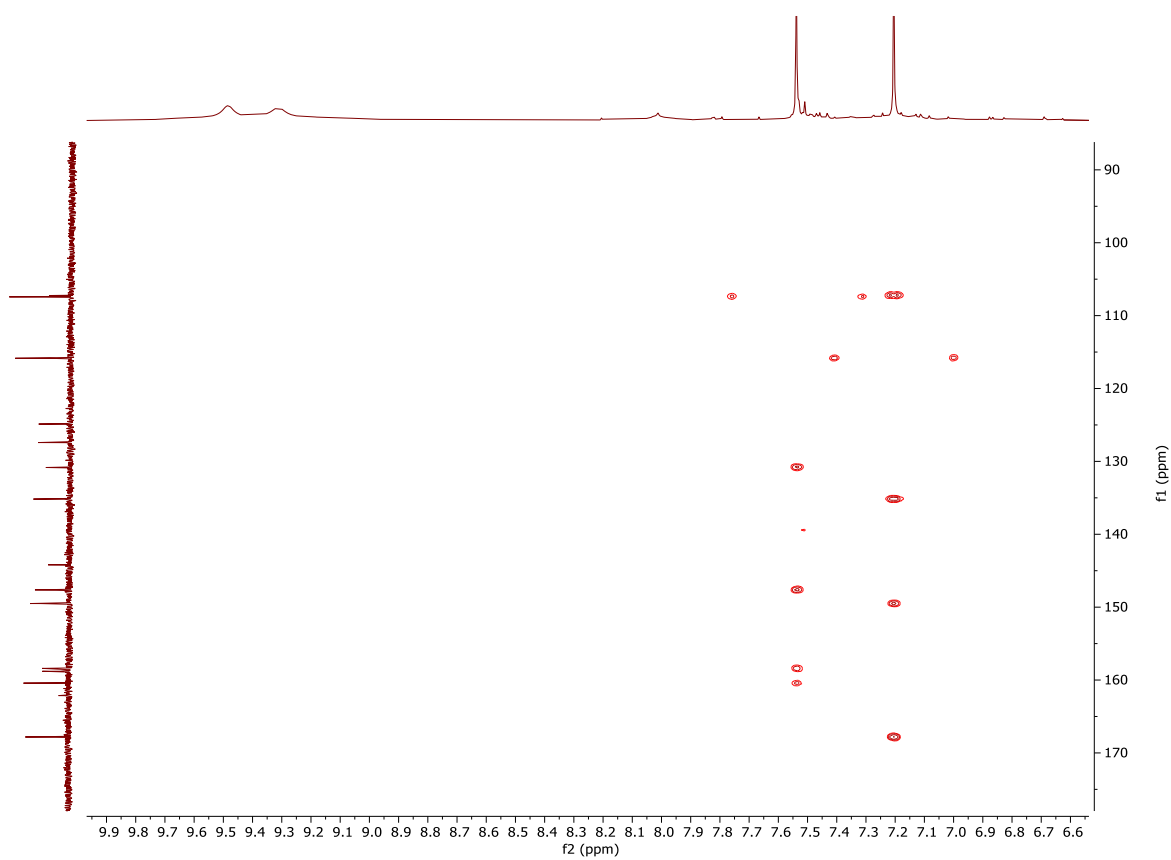

**Figure S3-4.** HMBC spectrum of compound **5** in THF-*d*8, 400/100 MHz

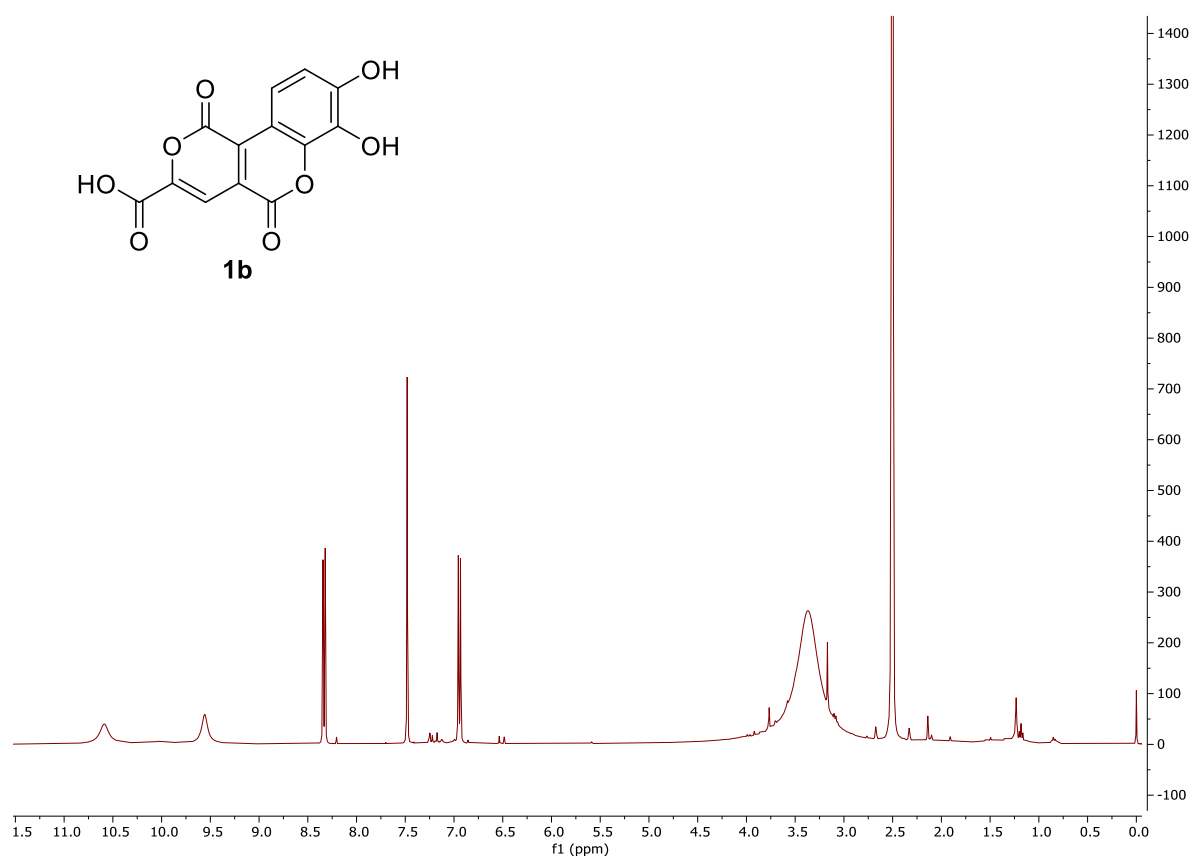

**Figure S4-1.**  $^1\text{H}$  spectrum of compound **1b** in DMSO- $d_6$ , 400MHz

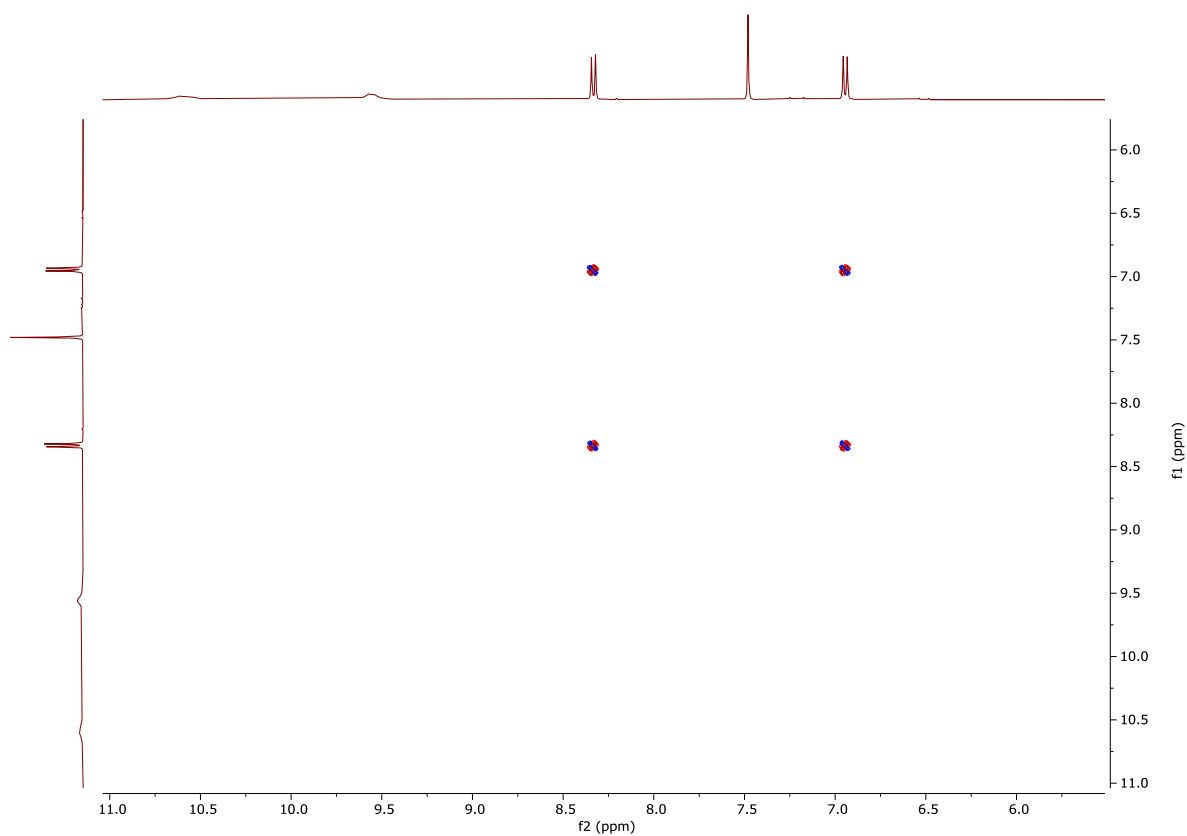

**Figure S4-2.** COSY spectrum of compound **1b** in DMSO- $d_6$ , 400MHz

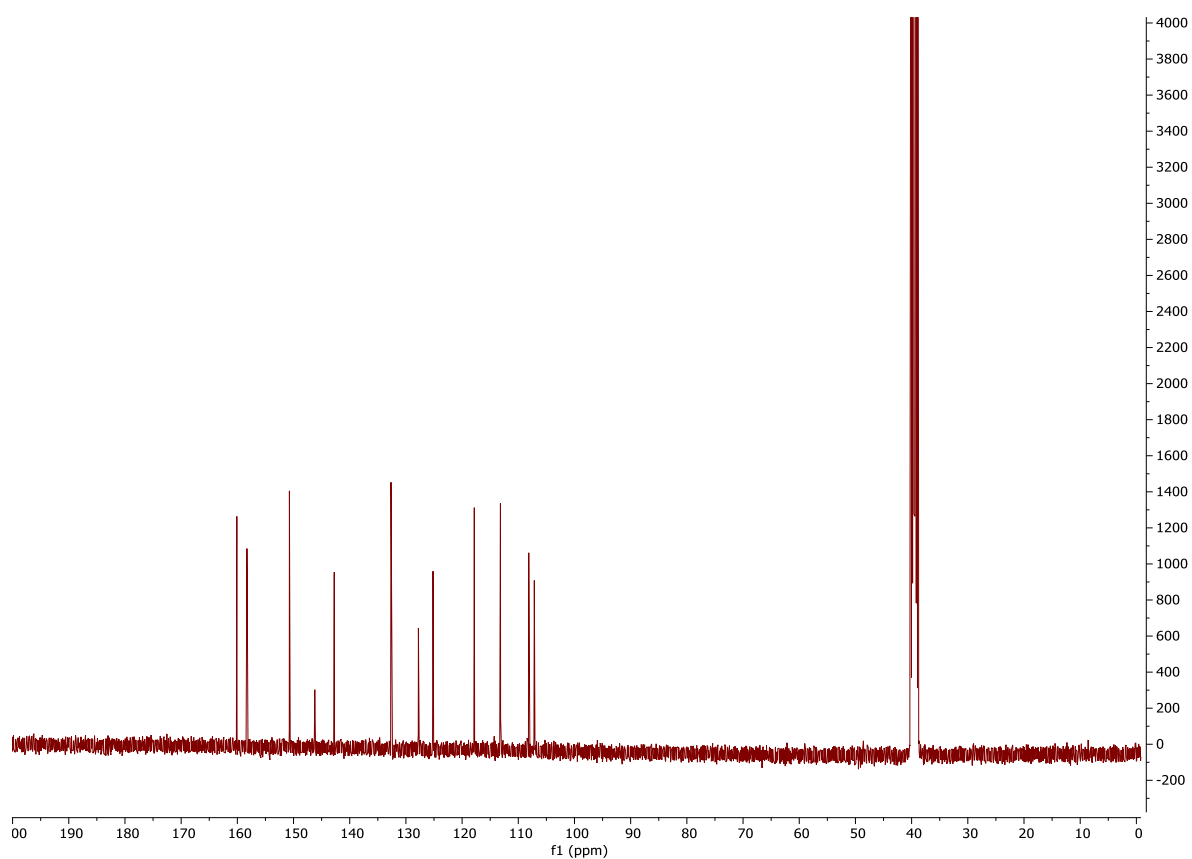

**Figure S4-3.**  $^{13}\text{C}$  spectrum of compound **1b** in  $\text{DMSO-}d_6$ , 100MHz

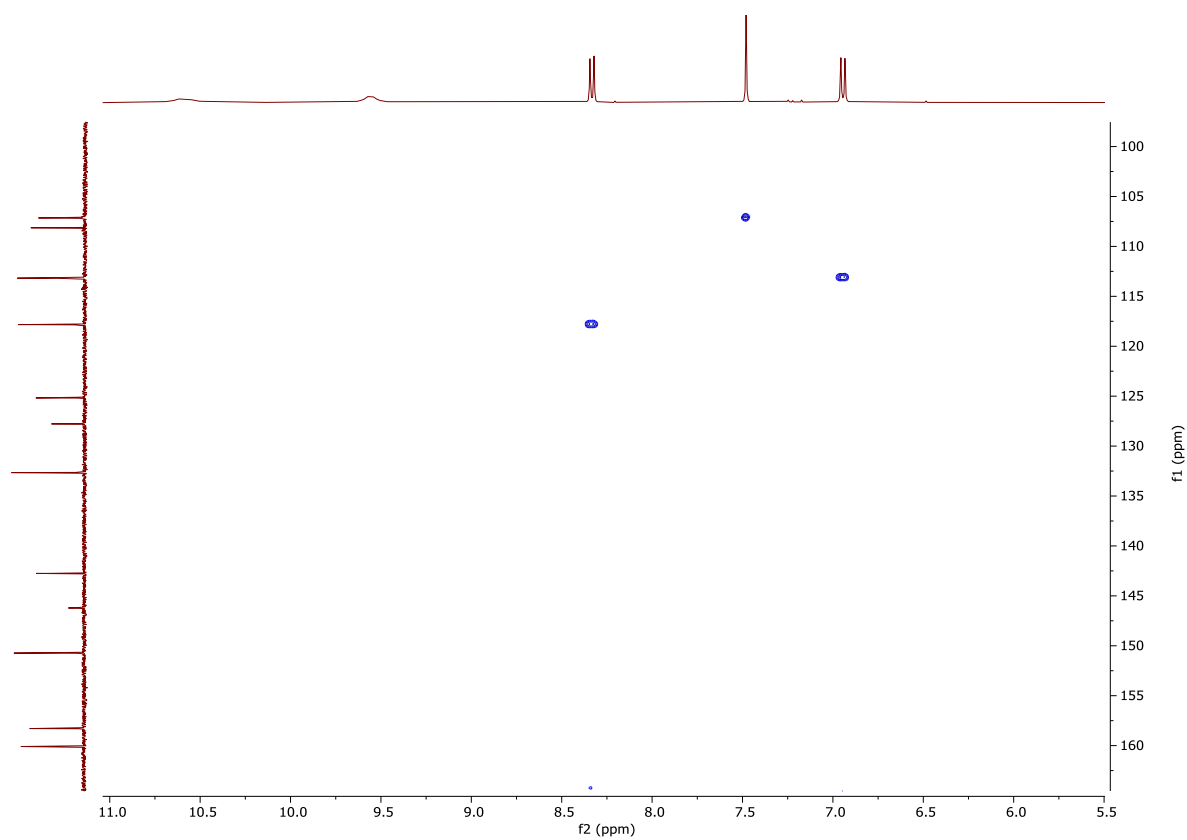

**Figure S4-4.** HSQC spectrum of compound **1b** in  $\text{DMSO-}d_6$ , 400/100MHz

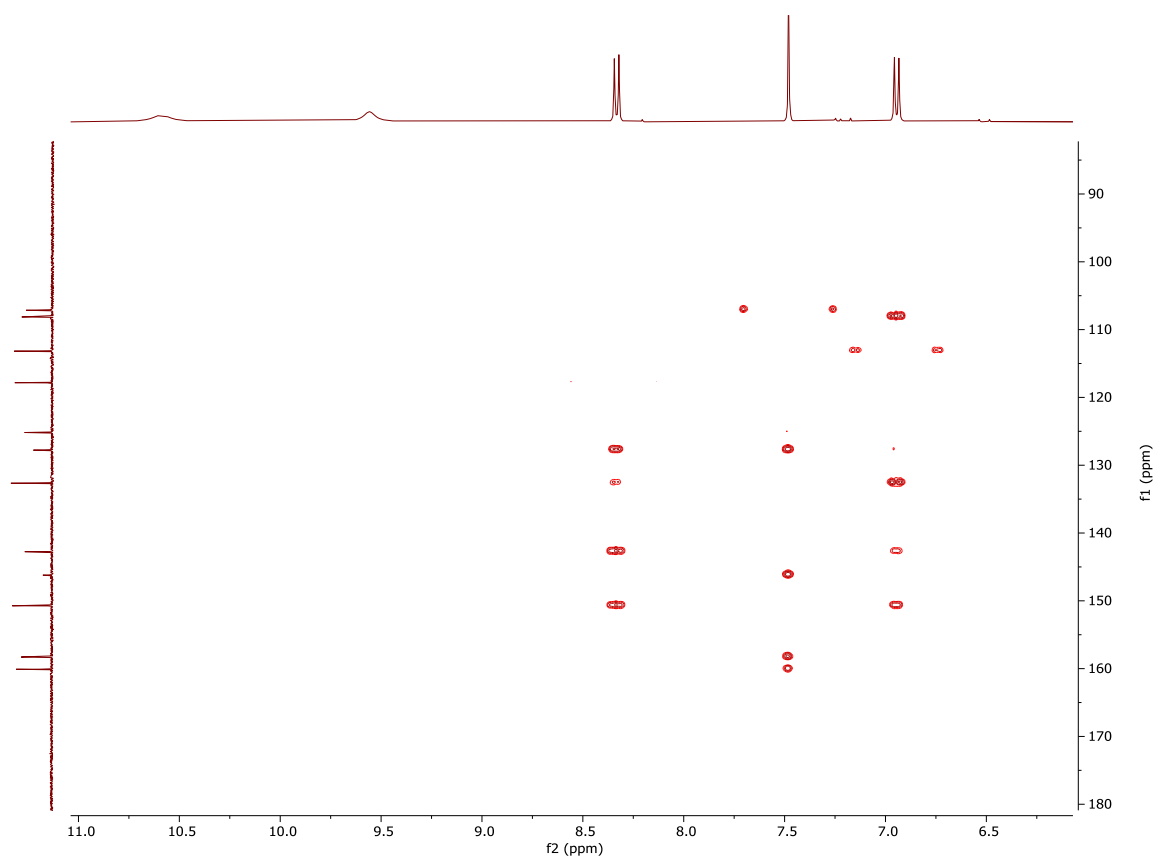

**Figure S4-5.** HMBC spectrum of compound **1b** in DMSO-*d*<sub>6</sub>, 400/100MHz

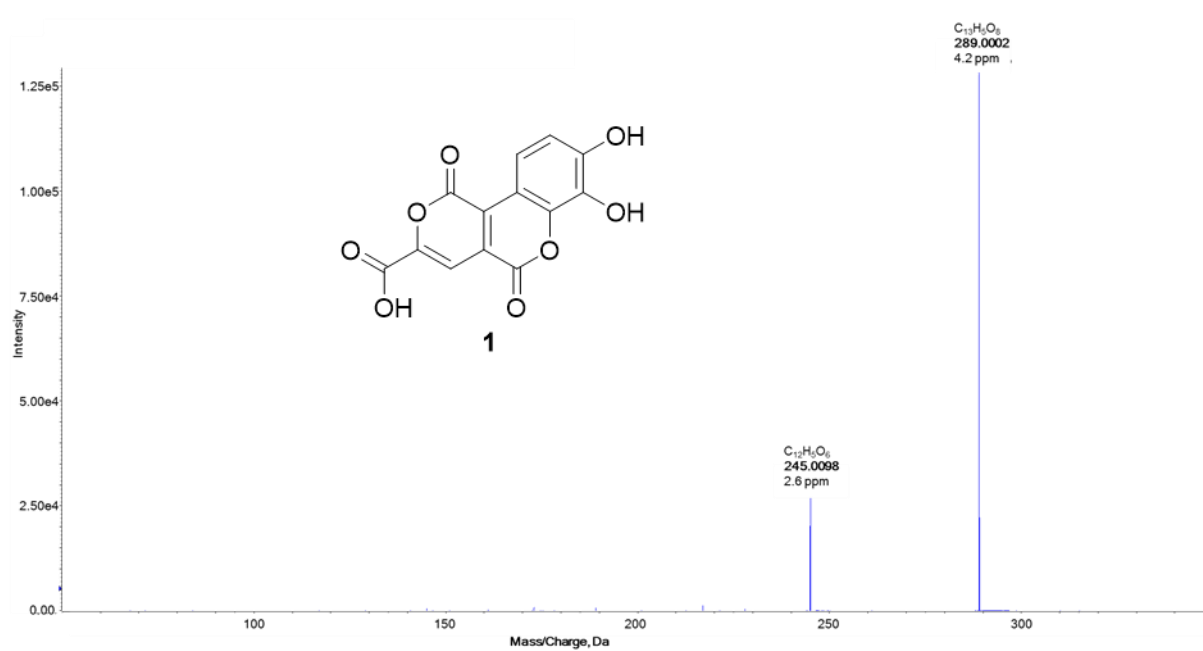

**Figure S5-1.** High resolution mass spectra (HRMS) acquired with quadrupole-time-of-flight-tandem instrument (QqTOF-MS) of compound **1**.



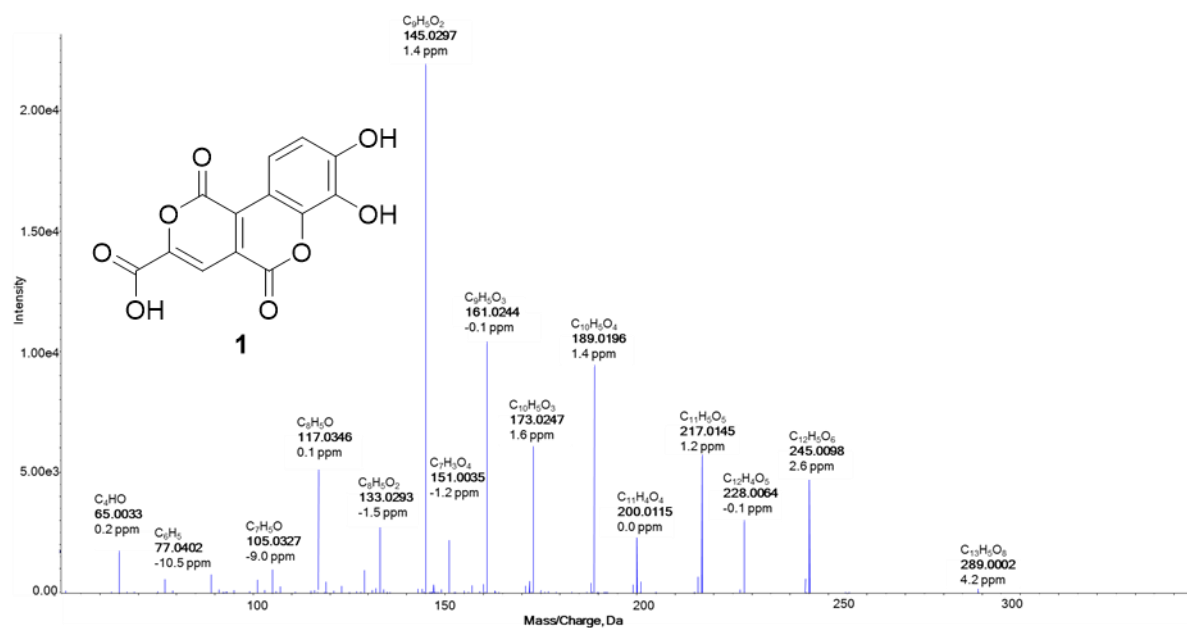

**Figure S5-2.** MS<sup>2</sup> of compound **1** acquired with quadrupole-time-of-flight-tandem instrument (QqTOF-MS/MS).

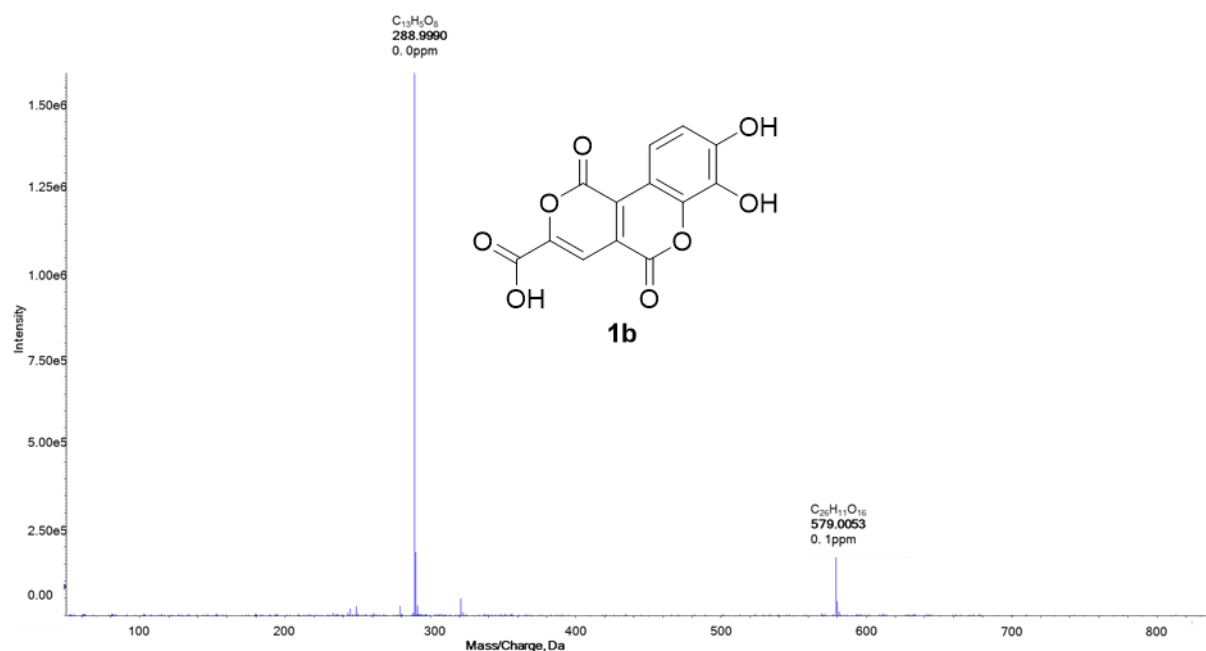

**Figure S6-1.** High resolution mass spectra (HRMS) acquired with quadrupole-time-of-flight-tandem instrument (QqTOF-MS) of synthetic compound **1b**

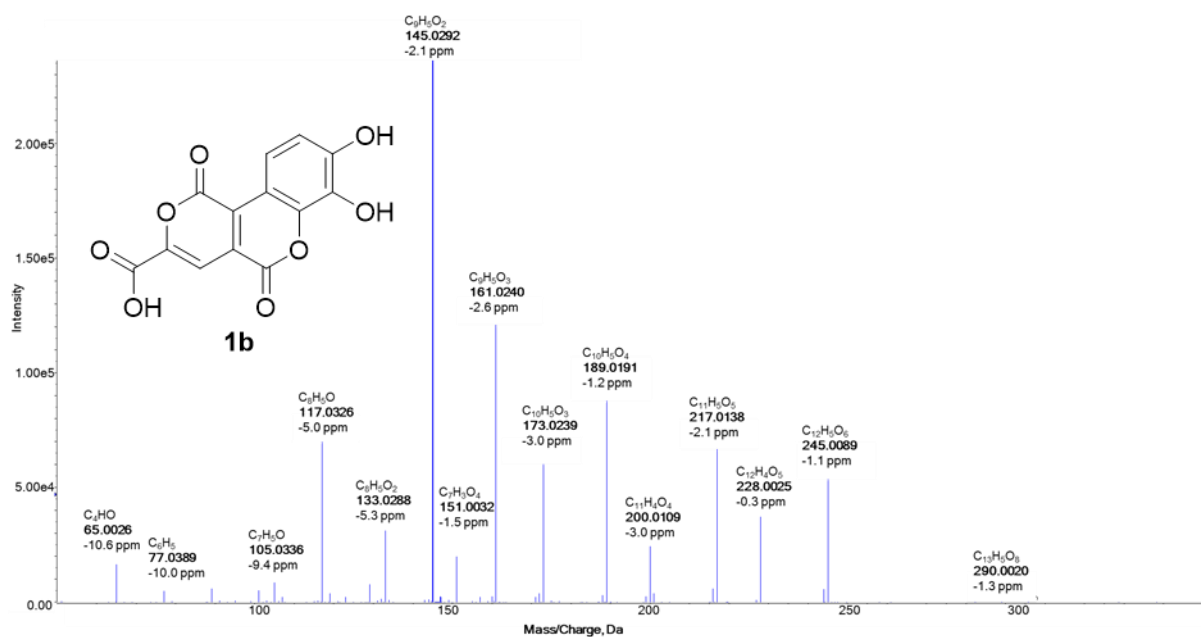

**Figure S6-2.** MS<sup>2</sup> of synthetic compound **1b** acquired with quadrupole-time-of-flight-tandem instrument (QqTOF-MS/MS)

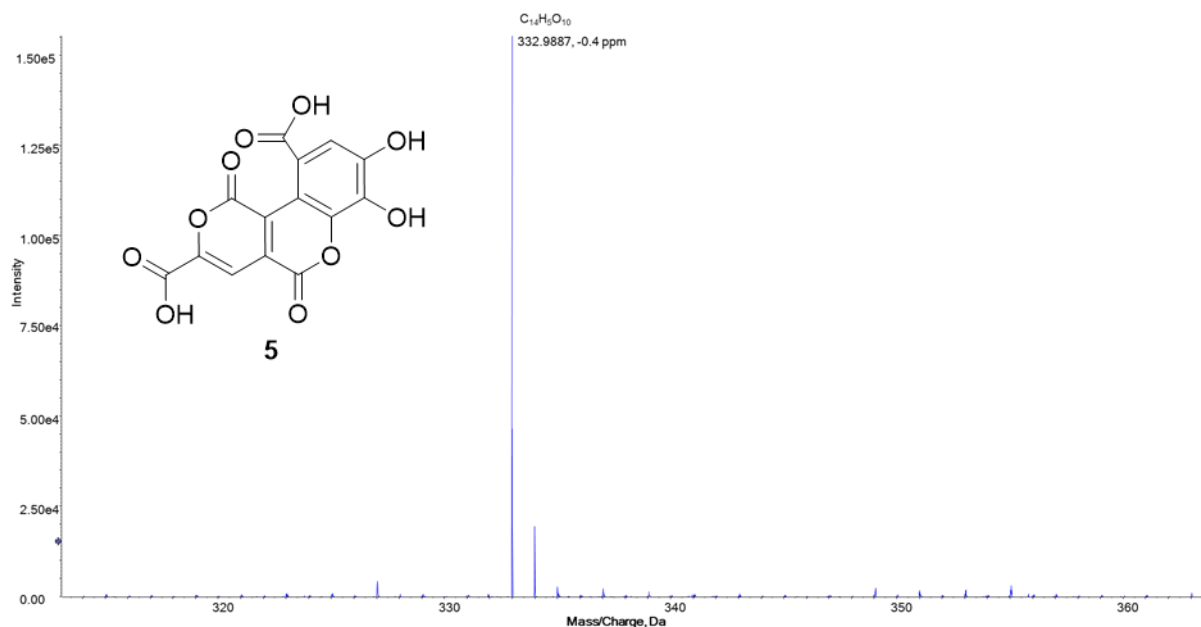

**Figure S7-1.** High resolution mass spectra (HRMS) acquired with quadrupole-time-of-flight-tandem instrument (QqTOF-MS) of synthetic compound **5**

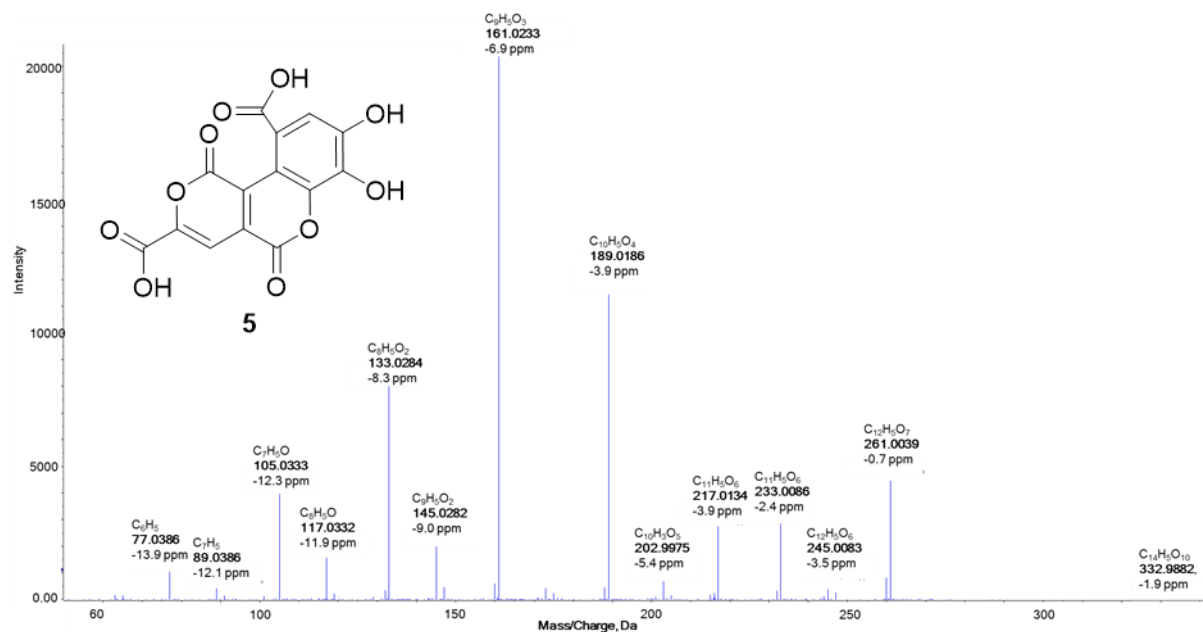

**Figure S7-2.** MS<sup>2</sup> of synthetic compound **5** acquired with quadrupole-time-of-flight-tandem instrument (QqTOF-MS/MS)

**Table S2-1.** DFT calculations: comparison between experimental and calculated chemical shifts\*

| Molecular structure and calculated $J$ -coupling                                                                                               | $\delta(^1\text{H})$ , ppm                                                           | $\delta(^{13}\text{C})$ , ppm                                                         |
|------------------------------------------------------------------------------------------------------------------------------------------------|--------------------------------------------------------------------------------------|---------------------------------------------------------------------------------------|
| 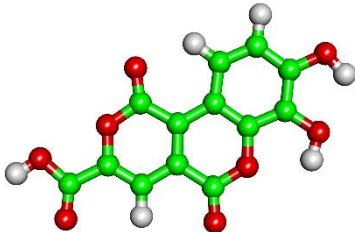<br>Lumnitzeralactone (I), $^3J_{\text{HH}} = 8.1 \text{ Hz}$ |    |    |
| <br>Isomer (II), $^3J_{\text{HH}} = 7.7 \text{ Hz}$           |    |    |
| <br>Isomer (III), $^3J_{\text{HH}} = 7.5 \text{ Hz}$        |  |  |
| <br>Isomer (IV), $^3J_{\text{HH}} = 7.7 \text{ Hz}$         |  |  |
| <br>Isomer (V), $^3J_{\text{HH}} = 7.4 \text{ Hz}$          |  |  |

\* Geometry optimization: # opt b3lyp/6-31+g(d,p) geom=connectivity;

NMR: # nmr=(giao,spinspin) mpw1pw91/6-311+g(2d,p) scrf=(iefpcm,solvent=methanol) geom=connectivity

**Table S2-2.** Cartesian coordinates of structures A-E used in DFT calculations

| Structure                                                                           | Cartesian Coordinates |             |             |             |
|-------------------------------------------------------------------------------------|-----------------------|-------------|-------------|-------------|
| Lumnitzeralactone (1)                                                               | Element               | X           | Y           | Z           |
| 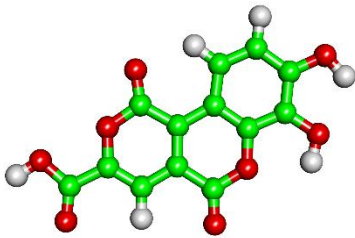   | C                     | -1.94132100 | 0.54152900  | 0.00026300  |
|                                                                                     | C                     | -3.33084100 | 0.50949900  | -0.00030500 |
|                                                                                     | C                     | -3.98314000 | -0.72941700 | -0.00082200 |
|                                                                                     | C                     | -3.22924500 | -1.91141900 | -0.00050000 |
|                                                                                     | C                     | -1.84330900 | -1.86882800 | 0.00018300  |
|                                                                                     | C                     | -1.15460200 | -0.63107300 | 0.00053400  |
|                                                                                     | C                     | 0.27884300  | -0.44001400 | 0.00075300  |
|                                                                                     | C                     | 0.81984100  | 0.83835500  | 0.00065600  |
|                                                                                     | C                     | -0.04131300 | 2.03720300  | 0.00080200  |
|                                                                                     | O                     | -1.40116600 | 1.80630300  | 0.00049700  |
|                                                                                     | C                     | 1.21064600  | -1.59411500 | 0.00133900  |
|                                                                                     | O                     | 2.56367800  | -1.29172600 | -0.00003900 |
|                                                                                     | C                     | 3.05078900  | -0.02352500 | -0.00016200 |
|                                                                                     | C                     | 2.23161200  | 1.05309500  | 0.00033500  |
|                                                                                     | O                     | -5.33558800 | -0.79300300 | -0.00152400 |
|                                                                                     | O                     | -4.10945400 | 1.63388700  | -0.00089900 |
|                                                                                     | O                     | 0.34751100  | 3.18120500  | 0.00127700  |
|                                                                                     | O                     | 0.90621200  | -2.76447900 | 0.00248000  |
|                                                                                     | C                     | 4.53371200  | 0.09503900  | -0.00100800 |
|                                                                                     | O                     | 5.10957000  | 1.16480800  | -0.00101700 |
|                                                                                     | O                     | 5.15801700  | -1.09716300 | -0.00189500 |
|                                                                                     | H                     | -3.75590200 | -2.85933000 | -0.00075300 |
|                                                                                     | H                     | -1.27151300 | -2.78523200 | 0.00050300  |
|                                                                                     | H                     | 2.64049200  | 2.05464800  | 0.00035300  |
|                                                                                     | H                     | -5.69923700 | 0.10672600  | -0.00152600 |
|                                                                                     | H                     | -3.54784100 | 2.42413900  | 0.00043200  |
|                                                                                     | H                     | 6.11372000  | -0.91758000 | -0.00246000 |
| Isomer (II)                                                                         | Element               | X           | Y           | Z           |
|  | C                     | -1.86489300 | 0.51052000  | 0.00016300  |
|                                                                                     | C                     | -3.26876200 | 0.39705300  | 0.00012100  |
|                                                                                     | C                     | -3.86340200 | -0.87719600 | 0.00002900  |
|                                                                                     | C                     | -3.05494400 | -2.01153900 | 0.00006300  |
|                                                                                     | C                     | -1.66225800 | -1.91267800 | 0.00003800  |
|                                                                                     | C                     | -1.03947400 | -0.65605600 | 0.00007800  |
|                                                                                     | C                     | 0.39892900  | -0.43641100 | -0.00002300 |
|                                                                                     | C                     | 0.88959500  | 0.85337000  | -0.00016900 |
|                                                                                     | C                     | 1.36759100  | -1.53803600 | -0.00014000 |
|                                                                                     | O                     | 2.72307600  | -1.17418000 | -0.00017500 |
|                                                                                     | C                     | 3.14446900  | 0.10719700  | -0.00033200 |
|                                                                                     | C                     | 2.28020800  | 1.15064100  | -0.00032400 |
|                                                                                     | O                     | -5.21409500 | -1.00004200 | -0.00000600 |
|                                                                                     | O                     | -4.11371000 | 1.45165500  | 0.00001300  |
|                                                                                     | O                     | 1.12821500  | -2.72306400 | -0.00013900 |
|                                                                                     | C                     | 4.62198300  | 0.30780700  | -0.00048900 |
|                                                                                     | O                     | 5.13414900  | 1.40930600  | 0.00015100  |
|                                                                                     | O                     | 5.30901100  | -0.84686500 | 0.00063400  |
|                                                                                     | H                     | -3.53482400 | -2.98491000 | 0.00004000  |
|                                                                                     | H                     | -1.05658700 | -2.80735700 | 0.00002700  |
|                                                                                     | H                     | 2.63989800  | 2.17086300  | -0.00043100 |

|   |             |             |             |
|---|-------------|-------------|-------------|
| H | -5.60848500 | -0.11287900 | -0.00022200 |
| H | -3.56998600 | 2.27649100  | -0.00042200 |
| H | 6.25435500  | -0.61850900 | 0.00122200  |
| C | -1.29358800 | 1.84276300  | 0.00026200  |
| O | -1.92801500 | 2.89048300  | 0.00010400  |
| O | 0.07923300  | 1.94916900  | -0.00006600 |

Isomer (III)

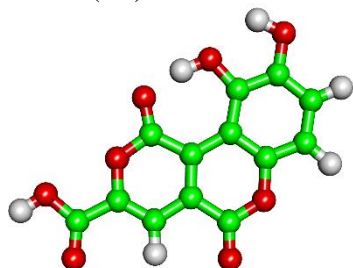

| Element | X           | Y           | Z           |
|---------|-------------|-------------|-------------|
| C       | 1.93955700  | 1.36213900  | 0.01368000  |
| C       | 3.28940800  | 1.66851600  | 0.01450300  |
| C       | 4.22531900  | 0.63676100  | 0.00148800  |
| C       | 3.79249200  | -0.68168300 | -0.01446000 |
| C       | 2.41870100  | -1.00490500 | -0.01467300 |
| C       | 1.42850800  | 0.02759200  | 0.00363000  |
| C       | -0.03188100 | -0.09655300 | 0.00694600  |
| C       | -0.82525800 | 1.04795600  | -0.00096100 |
| C       | -0.23734700 | 2.40570800  | 0.00213600  |
| O       | 1.11508300  | 2.46861100  | 0.02124600  |
| C       | -0.76220400 | -1.38448200 | 0.03411400  |
| O       | -2.12483300 | -1.35064800 | 0.01567500  |
| C       | -2.85915100 | -0.20687200 | -0.00420700 |
| C       | -2.25005900 | 0.99768700  | -0.00911900 |
| O       | -0.88686300 | 3.42825400  | -0.00531600 |
| O       | -0.28038000 | -2.51085200 | 0.07763400  |
| C       | -4.33477200 | -0.38833000 | -0.01670000 |
| O       | -5.10840300 | 0.54663200  | -0.03395200 |
| O       | -4.70488900 | -1.68159700 | -0.00695800 |
| H       | -2.82670100 | 1.91308400  | -0.02024400 |
| H       | -5.67722000 | -1.70203700 | -0.01635600 |
| O       | 4.70775400  | -1.68750200 | -0.03206100 |
| O       | 2.20852500  | -2.33576600 | -0.04319900 |
| H       | 1.23416700  | -2.55134400 | 0.00735000  |
| H       | 4.22387600  | -2.53015100 | -0.03832600 |
| H       | 5.29013900  | 0.84222400  | 0.00131000  |
| H       | 3.58791300  | 2.70995900  | 0.02346300  |

Isomer (IV)

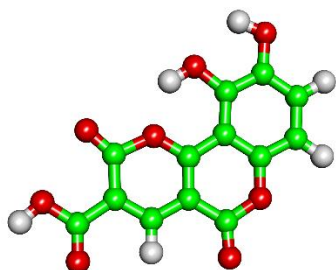

| Element | X           | Y           | Z           |
|---------|-------------|-------------|-------------|
| C       | -2.10813900 | 1.32765400  | -0.00003200 |
| C       | -3.48682900 | 1.48435800  | -0.00042300 |
| C       | -4.30032400 | 0.34949400  | -0.00054600 |
| C       | -3.75196900 | -0.93391800 | -0.00016000 |
| C       | -2.36106200 | -1.09914700 | 0.00002100  |
| C       | -1.51677100 | 0.03884800  | 0.00009000  |
| C       | -0.08668000 | 0.00095600  | 0.00016600  |
| C       | 0.68010100  | 1.15115000  | 0.00057400  |
| C       | 0.03830200  | 2.46991500  | 0.00062800  |
| O       | -1.34589100 | 2.46896700  | 0.00042000  |
| C       | 2.72158200  | -0.19851800 | 0.00037400  |
| C       | 2.09082600  | 1.02296700  | 0.00034200  |
| O       | 0.61538800  | 3.53112100  | -0.00070200 |
| C       | 4.21304300  | -0.19512300 | -0.00034000 |

|   |             |             |             |
|---|-------------|-------------|-------------|
| O | 4.87016800  | 0.82947300  | 0.00055400  |
| O | 4.77017500  | -1.42001500 | -0.00213000 |
| H | 2.69882300  | 1.92268100  | 0.00011500  |
| H | 5.73360000  | -1.28612900 | -0.00247900 |
| O | -4.57721600 | -2.01634100 | -0.00029700 |
| O | -1.92812600 | -2.38737900 | 0.00003200  |
| H | -0.95610000 | -2.43155200 | 0.00025100  |
| H | -4.03859300 | -2.82305900 | 0.00016500  |
| H | -5.38092000 | 0.44600000  | -0.00141800 |
| H | -3.90899900 | 2.48221800  | -0.00007300 |
| C | 1.94597400  | -1.42796400 | 0.00127500  |
| O | 2.26644200  | -2.58162600 | 0.00105700  |
| O | 0.50204300  | -1.20597100 | 0.00002000  |

Isomer (V)

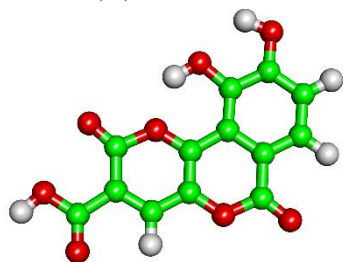

| Element | X           | Y           | Z           |
|---------|-------------|-------------|-------------|
| C       | -2.09352600 | 1.19109600  | -0.00033300 |
| C       | -3.48950100 | 1.23289000  | -0.00010700 |
| C       | -4.22842400 | 0.05252800  | -0.00005900 |
| C       | -3.57970600 | -1.18466700 | 0.00001000  |
| C       | -2.17347400 | -1.25306800 | -0.00009500 |
| C       | -1.42107900 | -0.06509900 | -0.00031000 |
| C       | 0.01358000  | -0.02061800 | -0.00017400 |
| C       | 0.69415000  | 1.16887500  | -0.00009900 |
| C       | 2.81962200  | -0.01396300 | -0.00008900 |
| C       | 2.10331000  | 1.16205500  | -0.00012600 |
| C       | 4.30565600  | 0.10757900  | -0.00016600 |
| O       | 4.87794700  | 1.18318000  | 0.00109700  |
| O       | 4.95987800  | -1.06680100 | -0.00182000 |
| H       | 2.64411500  | 2.10373000  | -0.00014600 |
| H       | 5.90933200  | -0.85536500 | -0.00177500 |
| O       | -4.31070200 | -2.32243800 | 0.00008900  |
| O       | -1.66228200 | -2.51458900 | -0.00032400 |
| H       | -0.68893900 | -2.49805200 | -0.00018200 |
| H       | -3.70955100 | -3.08526900 | 0.00034000  |
| H       | -5.31296800 | 0.06769200  | -0.00042600 |
| H       | -3.98181500 | 2.19840900  | 0.00025800  |
| C       | 2.13657900  | -1.30061400 | 0.00029700  |
| O       | 2.55983100  | -2.42462800 | 0.00191500  |
| O       | 0.69824800  | -1.18880800 | -0.00004200 |
| C       | -1.34604800 | 2.46083900  | -0.00027900 |
| O       | -1.83221100 | 3.56614100  | 0.00066800  |
| O       | 0.04591400  | 2.37317500  | -0.00019600 |

## Structure Elucidation Report for "SE\_Lumlac\_aftercalculation"

### Initial Data

#### Composition Restrictions:

Molecular Weight = 0.000-1000.000  
Double Bonds Equivalent = 0.00-100.00  
Allowed Composition = C(0-100) H(0-100) O(0-20) N(0-10)  
Molecular Formula = C<sub>13</sub>H<sub>6</sub>O<sub>8</sub>

#### Spectral Data:

standard 1H (user) - 5 peaks  
merged 1H - 4 peaks  
standard 13C (user) - 13 peaks  
merged 13C - 13 peaks  
COSY 1H-1H (user) - 2 peaks  
HSQC 13C-1H (user) - 3 peaks  
HMBC 13C-1H (user) - 20 peaks  
1,n-ADEQUATE(inverted) 13C-1H (user) - 7 peaks  
1,1-ADEQUATE 13C-1H (user) - 6 peaks

### Result of Automatic Elucidation

No molecule(s) have been found by NMR spectra in 0 database(s).  
0 stereoisomer(s) have been excluded from the search result.  
No molecule(s) have been found by NMR spectra in 0 database(s).  
0 stereoisomer(s) have been excluded from the search result.  
1 Molecular Connectivity Diagram (MCD) has been created from 1 MF  
Current Molecular Connectivity Diagram (MCD) passed all tests  
No updates performed.  
31061041 molecule(s) have been generated by Correlation Spectroscopy Based Generator and 44 molecule(s) have been stored.  
Generation time: 18 h 10 m 27 s (Check: 0 s, Generation: 18 h 10 m 27 s 325 ms)  
No (from No) connectivities have been extended during generation  
ACD/CNMR Spectrum (Neural Net) has been calculated for 44 of 44 structure(s) from Generated Molecules  
44 of 44 structure(s) have been stored in Generated Molecules after removing duplicates  
ACD/HNMR Spectrum (Neural Net) has been calculated for 44 of 44 structure(s) from Generated Molecules  
44 molecules have been found for the current spectrum query.

### Most Probable Structure

Following structure has been placed to the first position after spectra calculation

#### Carbon Assignment

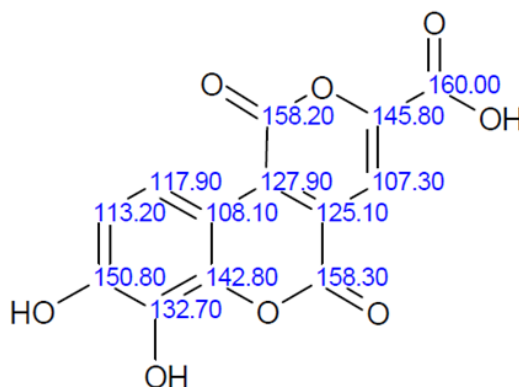

| #  | N  | Shift (ppm) | Atoms | XHn   |
|----|----|-------------|-------|-------|
| 1  | 1  | 107.300     | 1     | CH(d) |
| 2  | 4  | 108.100     | 1     | C(s)  |
| 3  | 2  | 113.200     | 1     | CH(d) |
| 4  | 3  | 117.900     | 1     | CH(d) |
| 5  | 5  | 125.100     | 1     | C(s)  |
| 6  | 6  | 127.900     | 1     | C(s)  |
| 7  | 7  | 132.700     | 1     | C(s)  |
| 8  | 8  | 142.800     | 1     | C(s)  |
| 9  | 9  | 145.800     | 1     | C(s)  |
| 10 | 10 | 150.800     | 1     | C(s)  |
| 11 | 11 | 158.200     | 1     | C(s)  |
| 12 | 12 | 158.300     | 1     | C(s)  |

#### Proton Assignment

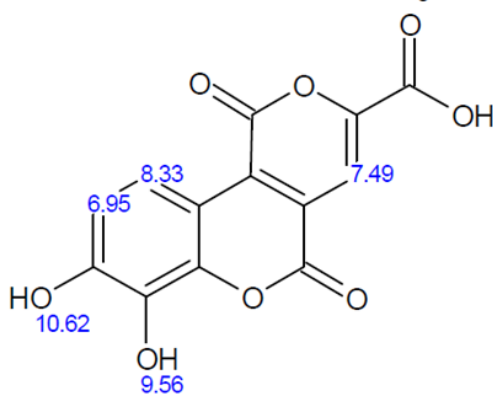

| # | N  | Mark | Shift (ppm) | Protons |
|---|----|------|-------------|---------|
| 1 | 2  |      | 6.950       | 1       |
| 2 | 1  |      | 7.490       | 1       |
| 3 | 3  |      | 8.330       | 1       |
| 4 | 14 |      | 9.560       | 1       |

Figure S8-1. Part of ACD-SE report



|                                                                                                                      |                                                                                                   |                                                                                                   |                                                                                                    |                                                                                                     |
|----------------------------------------------------------------------------------------------------------------------|---------------------------------------------------------------------------------------------------|---------------------------------------------------------------------------------------------------|----------------------------------------------------------------------------------------------------|-----------------------------------------------------------------------------------------------------|
| 1 (ID:12)<br>The Best Structure<br> | 2 (ID:25)<br>    | 3 (ID:16)<br>    | 4 (ID:29)<br>    | 5 (ID:30)<br>    |
| $d_N(^{13}\text{C}+^1\text{H})$ : 3.888                                                                              | $d_N(^{13}\text{C}+^1\text{H})$ : 3.888                                                           | $d_N(^{13}\text{C}+^1\text{H})$ : 4.037                                                           | $d_N(^{13}\text{C}+^1\text{H})$ : 4.037                                                            | $d_N(^{13}\text{C}+^1\text{H})$ : 4.710                                                             |
| 6 (ID:17)<br>                       | 7 (ID:6)<br>     | 8 (ID:19)<br>    | 9 (ID:13)<br>    | 10 (ID:26)<br>   |
| $d_N(^{13}\text{C}+^1\text{H})$ : 4.726                                                                              | $d_N(^{13}\text{C}+^1\text{H})$ : 4.953                                                           | $d_N(^{13}\text{C}+^1\text{H})$ : 4.953                                                           | $d_N(^{13}\text{C}+^1\text{H})$ : 4.987                                                            | $d_N(^{13}\text{C}+^1\text{H})$ : 4.987                                                             |
| 11 (ID:8)<br>                      | 12 (ID:21)<br>  | 13 (ID:22)<br>  | 14 (ID:9)<br>   | 15 (ID:27)<br>  |
| $d_N(^{13}\text{C}+^1\text{H})$ : 5.101                                                                              | $d_N(^{13}\text{C}+^1\text{H})$ : 5.101                                                           | $d_N(^{13}\text{C}+^1\text{H})$ : 5.717                                                           | $d_N(^{13}\text{C}+^1\text{H})$ : 5.732                                                            | $d_N(^{13}\text{C}+^1\text{H})$ : 6.641                                                             |
| 16 (ID:14)<br>                    | 17 (ID:23)<br> | 18 (ID:10)<br> | 19 (ID:28)<br> | 20 (ID:15)<br> |
| $d_N(^{13}\text{C}+^1\text{H})$ : 6.657                                                                              | $d_N(^{13}\text{C}+^1\text{H})$ : 6.918                                                           | $d_N(^{13}\text{C}+^1\text{H})$ : 6.918                                                           | $d_N(^{13}\text{C}+^1\text{H})$ : 7.646                                                            | $d_N(^{13}\text{C}+^1\text{H})$ : 7.646                                                             |
| 21 (ID:11)<br>                    | 22 (ID:24)<br> | 23 (ID:20)<br> | 24 (ID:7)<br>  | 25 (ID:5)<br>  |
| $d_N(^{13}\text{C}+^1\text{H})$ : 7.730                                                                              | $d_N(^{13}\text{C}+^1\text{H})$ : 7.730                                                           | $d_N(^{13}\text{C}+^1\text{H})$ : 8.535                                                           | $d_N(^{13}\text{C}+^1\text{H})$ : 8.535                                                            | $d_N(^{13}\text{C}+^1\text{H})$ : 8.619                                                             |

Figure S8-2. Overview of structures generated by ACD-SE

|                                                                                                                                                                 |                                                                                                                                                                 |                                                                                                                                                                 |                                                                                                                                                                  |                                                                                                                                                                  |
|-----------------------------------------------------------------------------------------------------------------------------------------------------------------|-----------------------------------------------------------------------------------------------------------------------------------------------------------------|-----------------------------------------------------------------------------------------------------------------------------------------------------------------|------------------------------------------------------------------------------------------------------------------------------------------------------------------|------------------------------------------------------------------------------------------------------------------------------------------------------------------|
| <p>26 (ID:18)</p> 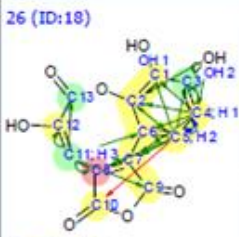 <p><math>d_N(^{13}\text{C}+^1\text{H}): 8.619</math></p>    | <p>27 (ID:3)</p>  <p><math>d_N(^{13}\text{C}+^1\text{H}): 12.437</math></p>    | <p>28 (ID:4)</p>  <p><math>d_N(^{13}\text{C}+^1\text{H}): 12.452</math></p>    | <p>29 (ID:1)</p>  <p><math>d_N(^{13}\text{C}+^1\text{H}): 12.714</math></p>    | <p>30 (ID:2)</p>  <p><math>d_N(^{13}\text{C}+^1\text{H}): 12.714</math></p>   |
| <p>31 (ID:37)</p>  <p><math>d_N(^{13}\text{C}+^1\text{H}): 13.851</math></p>   | <p>32 (ID:38)</p>  <p><math>d_N(^{13}\text{C}+^1\text{H}): 13.851</math></p>   | <p>33 (ID:39)</p>  <p><math>d_N(^{13}\text{C}+^1\text{H}): 13.851</math></p>   | <p>34 (ID:40)</p>  <p><math>d_N(^{13}\text{C}+^1\text{H}): 13.851</math></p>   | <p>35 (ID:31)</p>  <p><math>d_N(^{13}\text{C}+^1\text{H}): 13.942</math></p>  |
| <p>36 (ID:32)</p>  <p><math>d_N(^{13}\text{C}+^1\text{H}): 13.942</math></p>  | <p>37 (ID:33)</p>  <p><math>d_N(^{13}\text{C}+^1\text{H}): 13.942</math></p>  | <p>38 (ID:34)</p>  <p><math>d_N(^{13}\text{C}+^1\text{H}): 13.942</math></p>  | <p>39 (ID:41)</p>  <p><math>d_N(^{13}\text{C}+^1\text{H}): 14.843</math></p>  | <p>40 (ID:42)</p>  <p><math>d_N(^{13}\text{C}+^1\text{H}): 14.843</math></p> |
| <p>41 (ID:43)</p>  <p><math>d_N(^{13}\text{C}+^1\text{H}): 16.713</math></p> | <p>42 (ID:44)</p>  <p><math>d_N(^{13}\text{C}+^1\text{H}): 16.713</math></p> | <p>43 (ID:35)</p>  <p><math>d_N(^{13}\text{C}+^1\text{H}): 18.033</math></p> | <p>44 (ID:36)</p>  <p><math>d_N(^{13}\text{C}+^1\text{H}): 18.033</math></p> |                                                                                                                                                                  |

Figure S8-2, continued. Overview of structures generated by ACD-SE

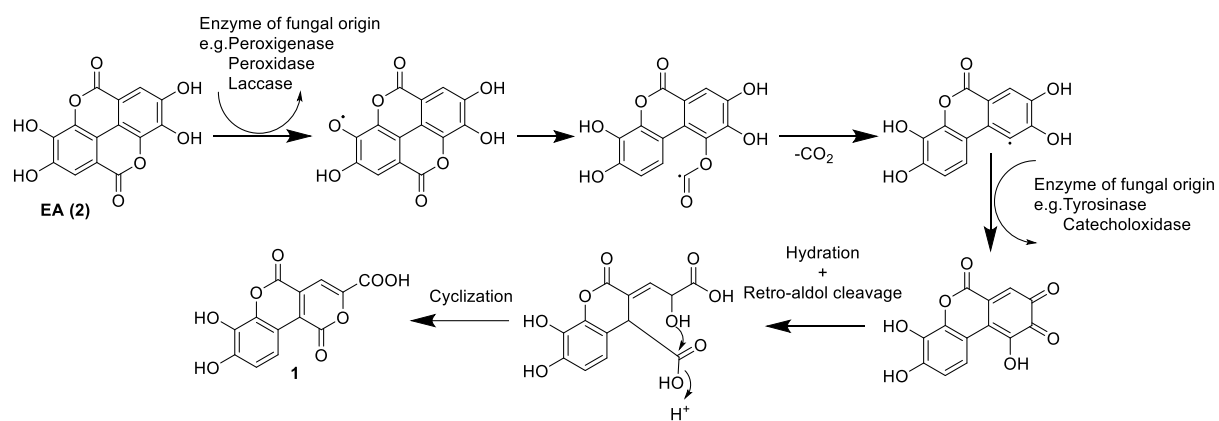

**Scheme S2-1.** A suggested pathway for the biosynthesis of lumnitzeralactone (**1**), including a radical induced decarboxylation step (dark pathway)

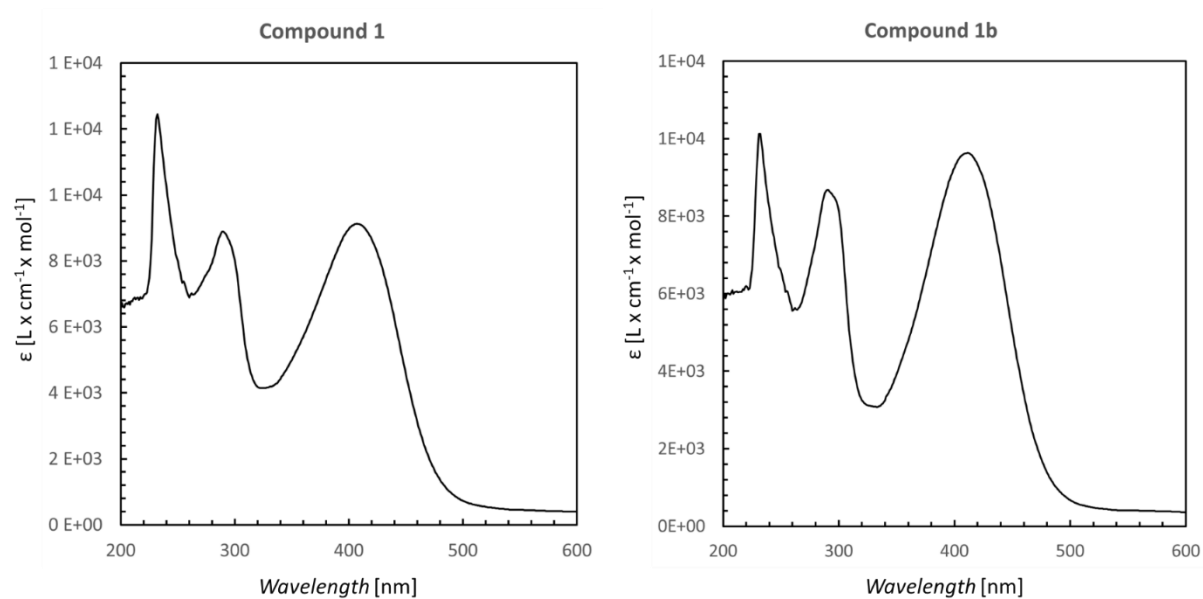

**Figure S9-1.** UV spectra of isolated compound **1** and synthetic **1b**

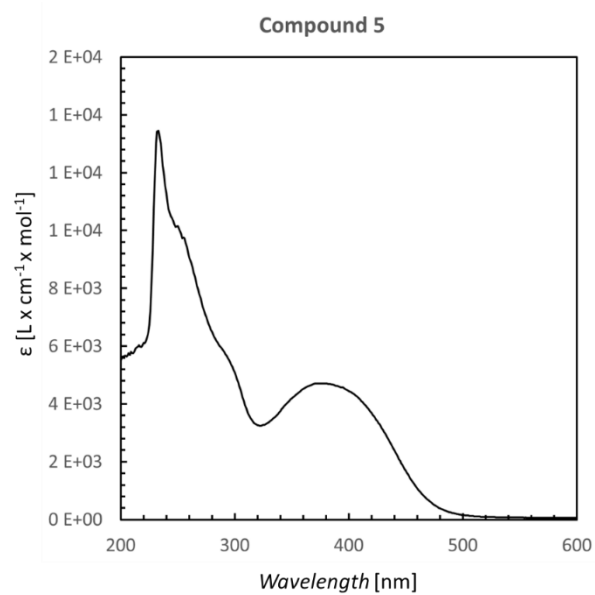

**Figure S9-2.** UV spectrum of compound **5**

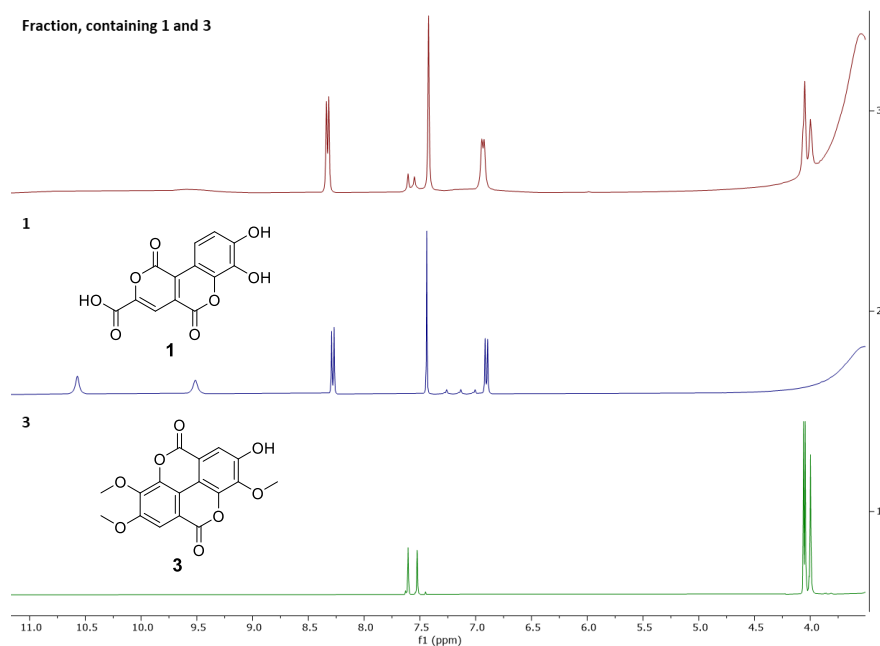

**Figure S10-1.**  $^1\text{H}$  NMR spectrum of the antibacterial fraction containing **1** and **3** compared to the isolated compounds **1** and **3** in  $\text{DMSO}-d_6$ , 400 MHz.

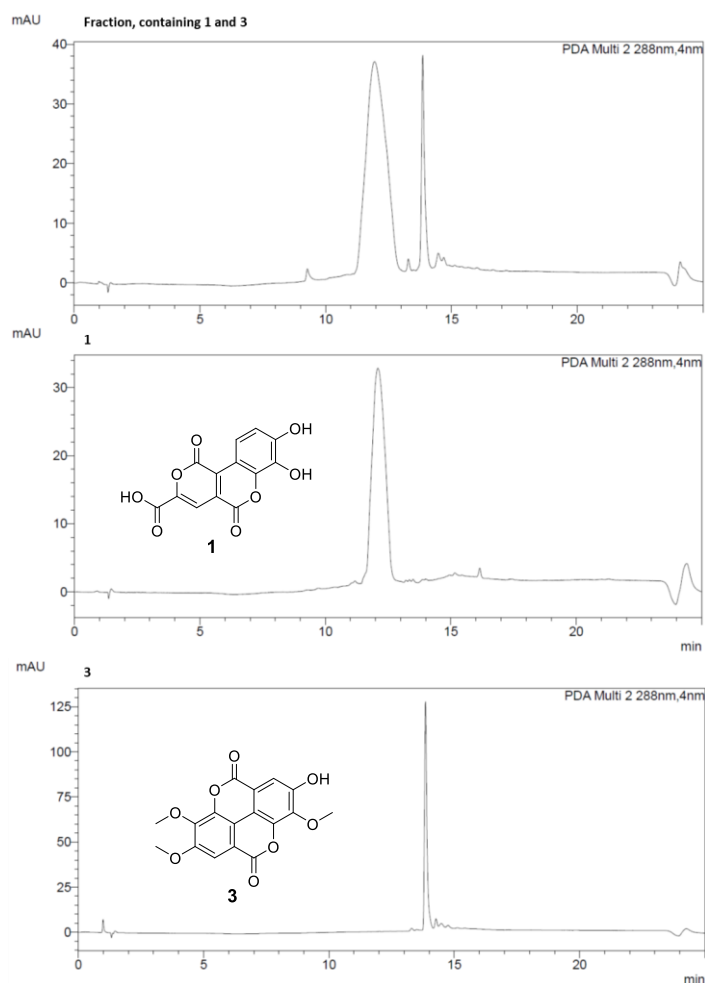

**Figure S10-2.** HPLC chromatogram of the antibacterial fraction containing **1** and **3** compared to the isolated compounds **1** and **3** (YMC-Triart C18; water (A)/methanol (B) gradient: 0-5, 5% B; 2-12 min, 5-100% B; 12-20 min, 100% B isocratic, flow rate of 1.5 mL/min).
